# Supplementary material for: Synthesis, Antibacterial and Antifungal Activity of Some New Pyrazoline and Pyrazole Derivatives
Source: PubMed Central journal article supplement (PMC6270532; doi:10.3390/molecules18032683), 2013-02-28

# Supplementary Materials

Figure 1. <sup>1</sup>H-NMR of compound 2

Figure 3. <sup>1</sup>H-NMR of compound 4

Figure 5. <sup>1</sup>H-NMR of compound 18

Figure 7. <sup>1</sup>H-NMR of compound 24

Figure 9. <sup>1</sup>H-NMR of compound 33

Figure 11. <sup>1</sup>H-NMR of compound 36

Figure 13. <sup>1</sup>H-NMR of compound 40

Figure 15. <sup>13</sup>C-NMR of compound 27

Figure 17. <sup>13</sup>C-NMR of compound 36

Figure 2. <sup>1</sup>H-NMR of compound 3

Figure 4. <sup>1</sup>H-NMR of compound 11

Figure 6. <sup>1</sup>H-NMR of compound 22

Figure 8. <sup>1</sup>H-NMR of compound 27

Figure 10. <sup>1</sup>H-NMR of compound 34

Figure 12. <sup>1</sup>H-NMR of compound 38

Figure 14. <sup>13</sup>C-NMR of compound 2

Figure 16. <sup>13</sup>C-NMR of compound 35

Figure 18. <sup>13</sup>C-NMR of compound 22

Figure 1. <sup>1</sup>H-NMR of compound 2.

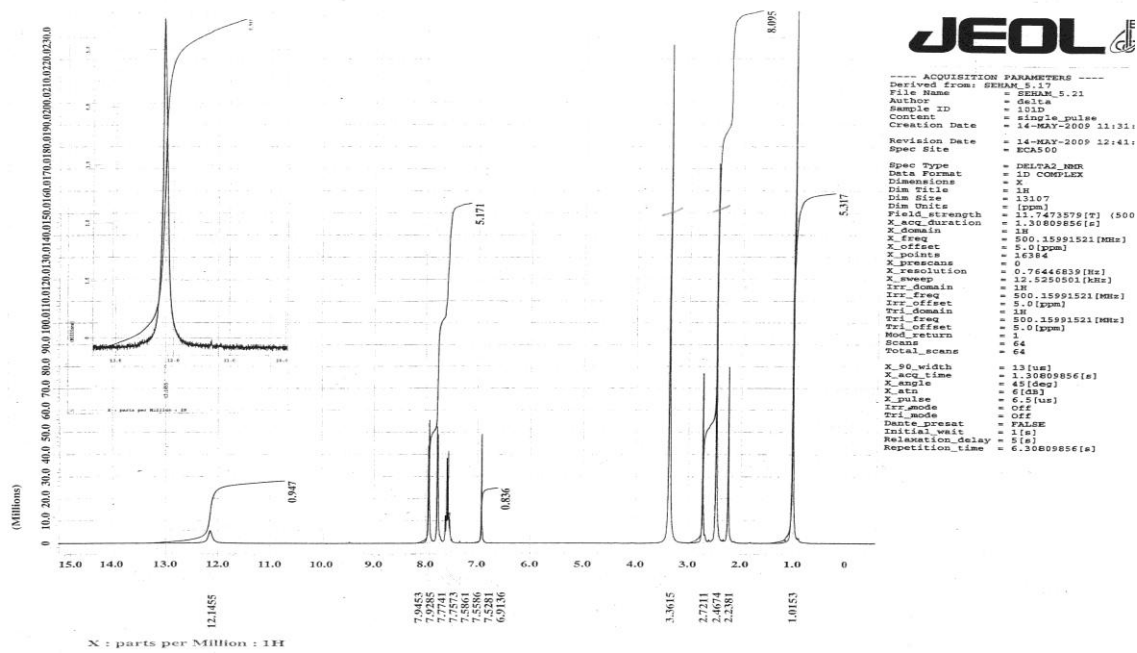

Figure 2. <sup>1</sup>H-NMR of compound 3.

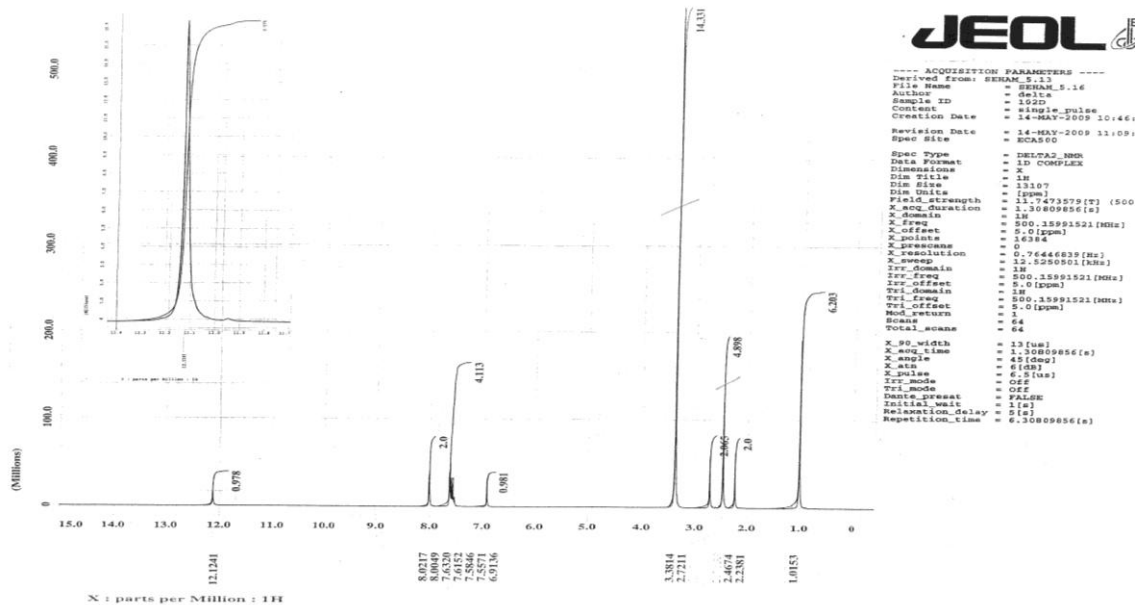

Figure 2. Cont.

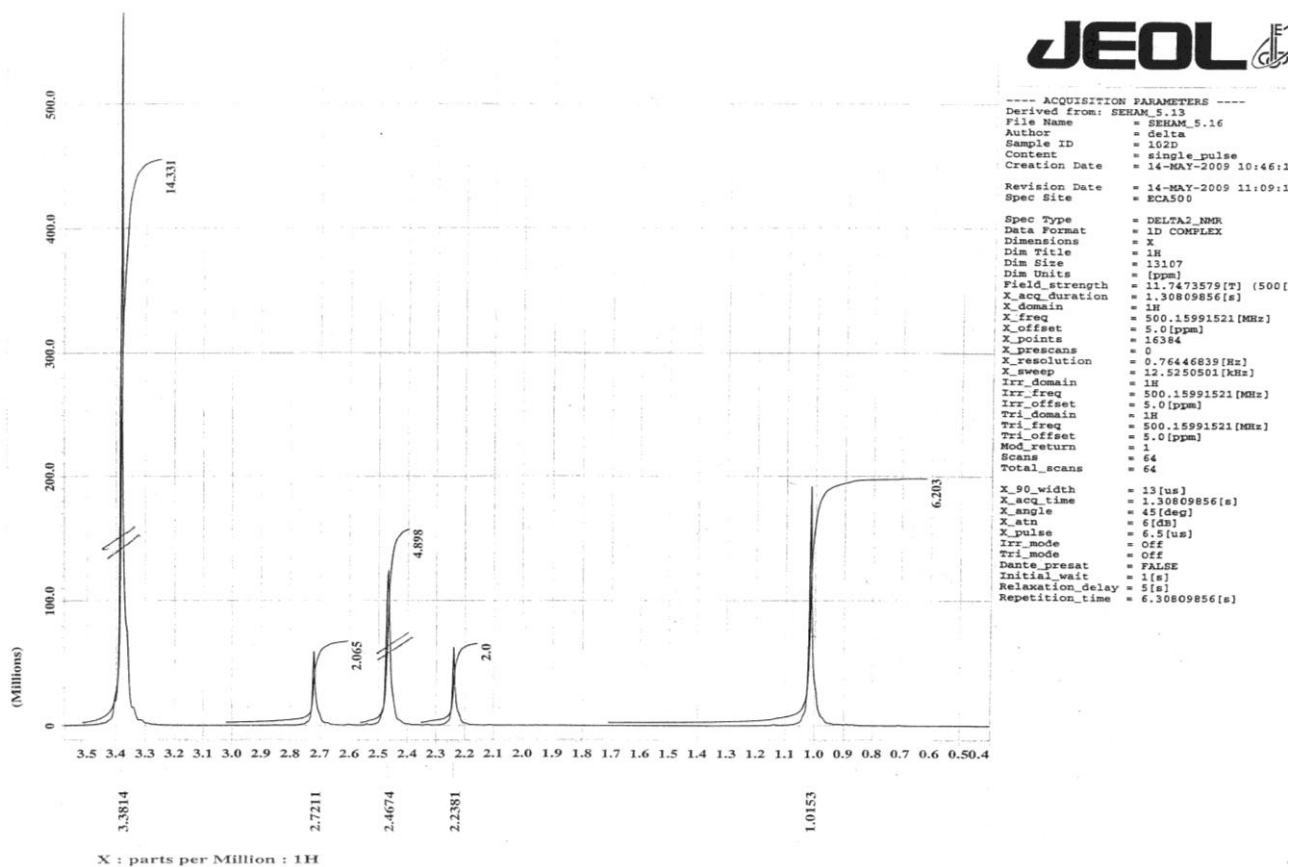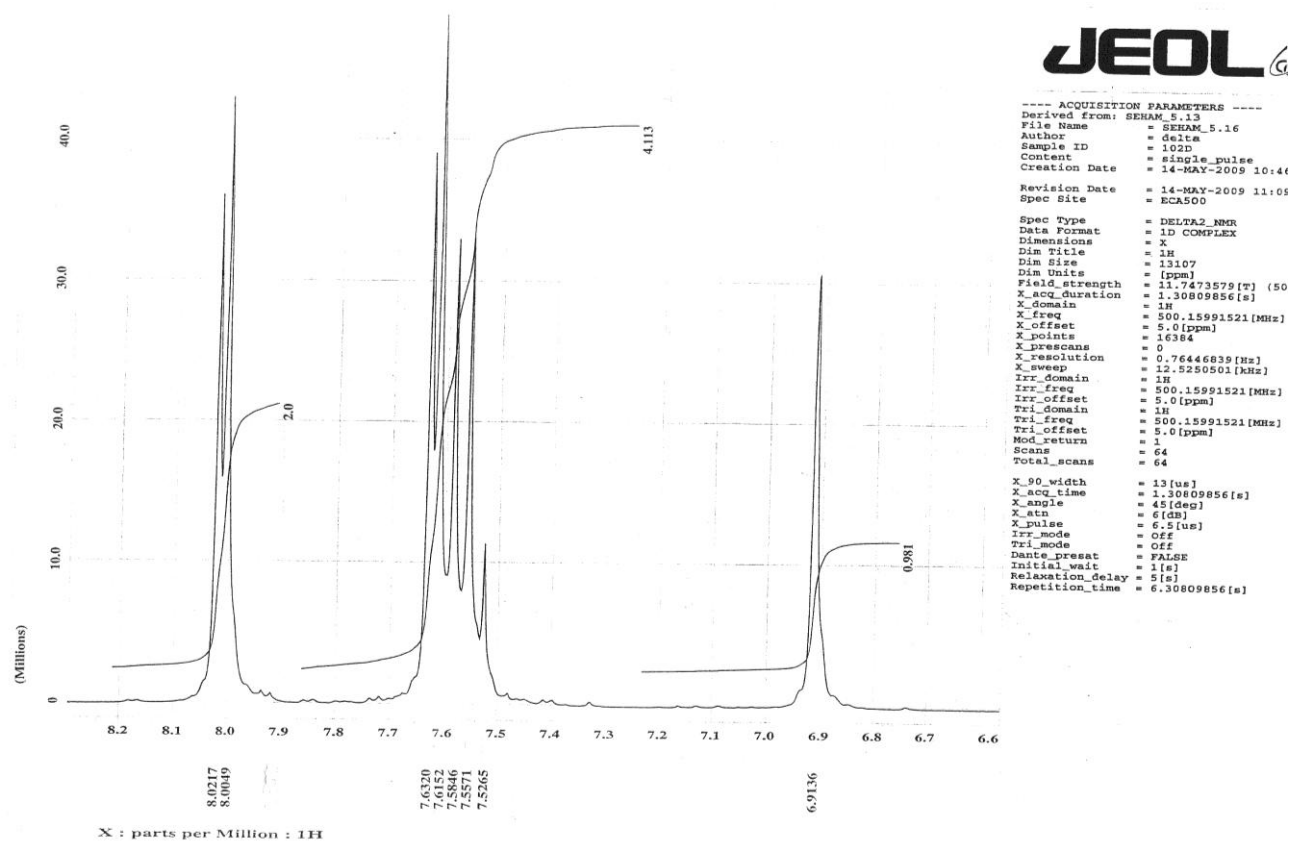

Figure 3. <sup>1</sup>H-NMR of compound 4.

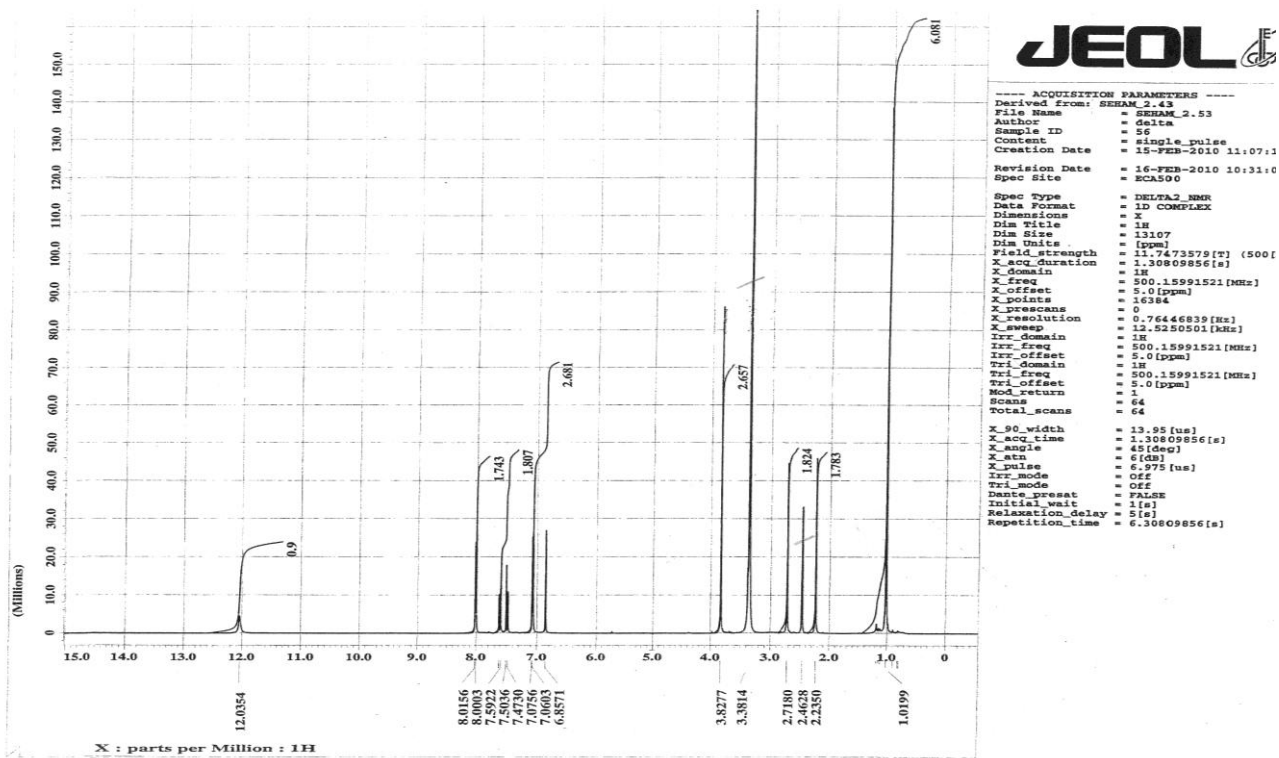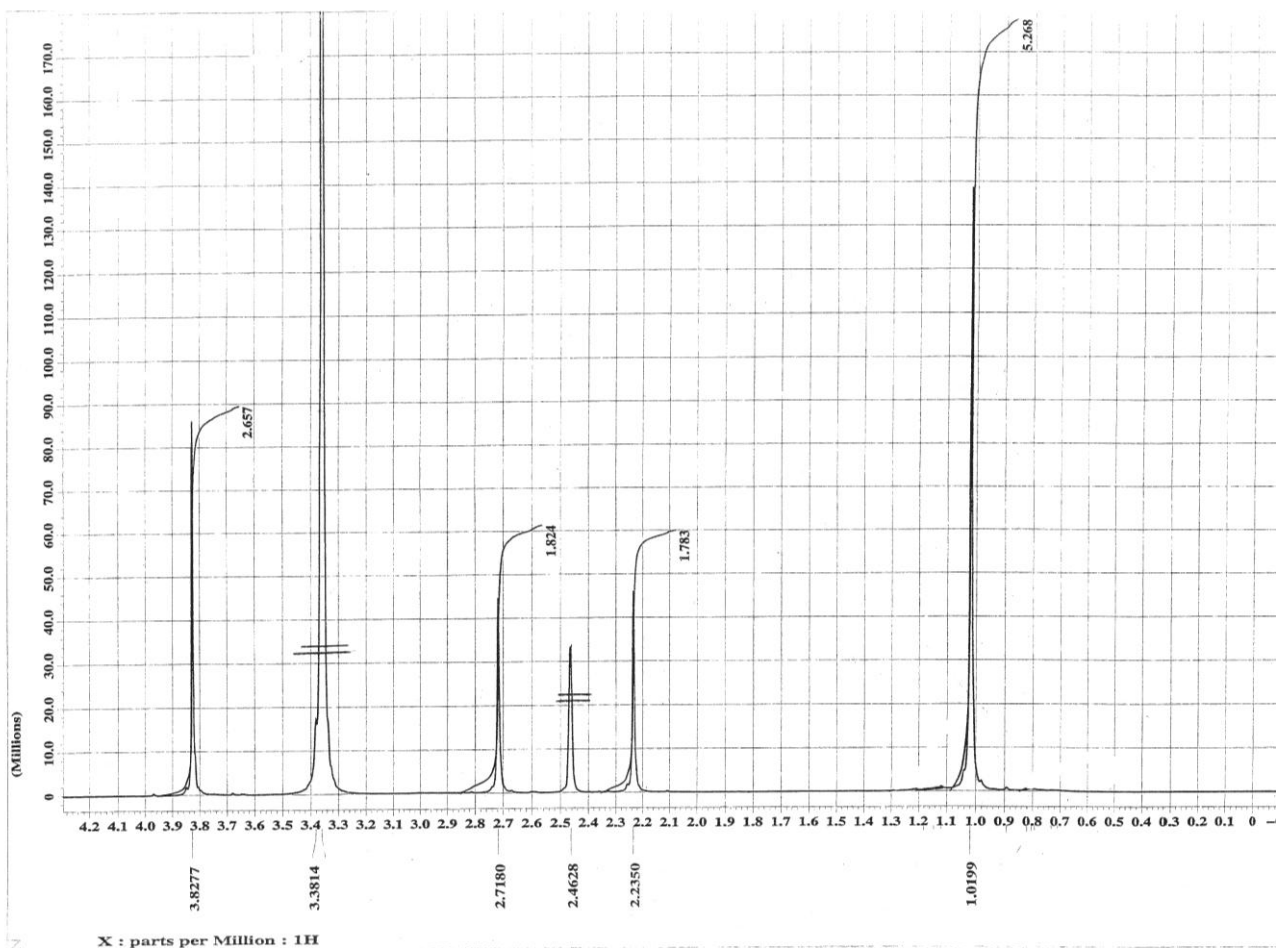

Figure 3. Cont.

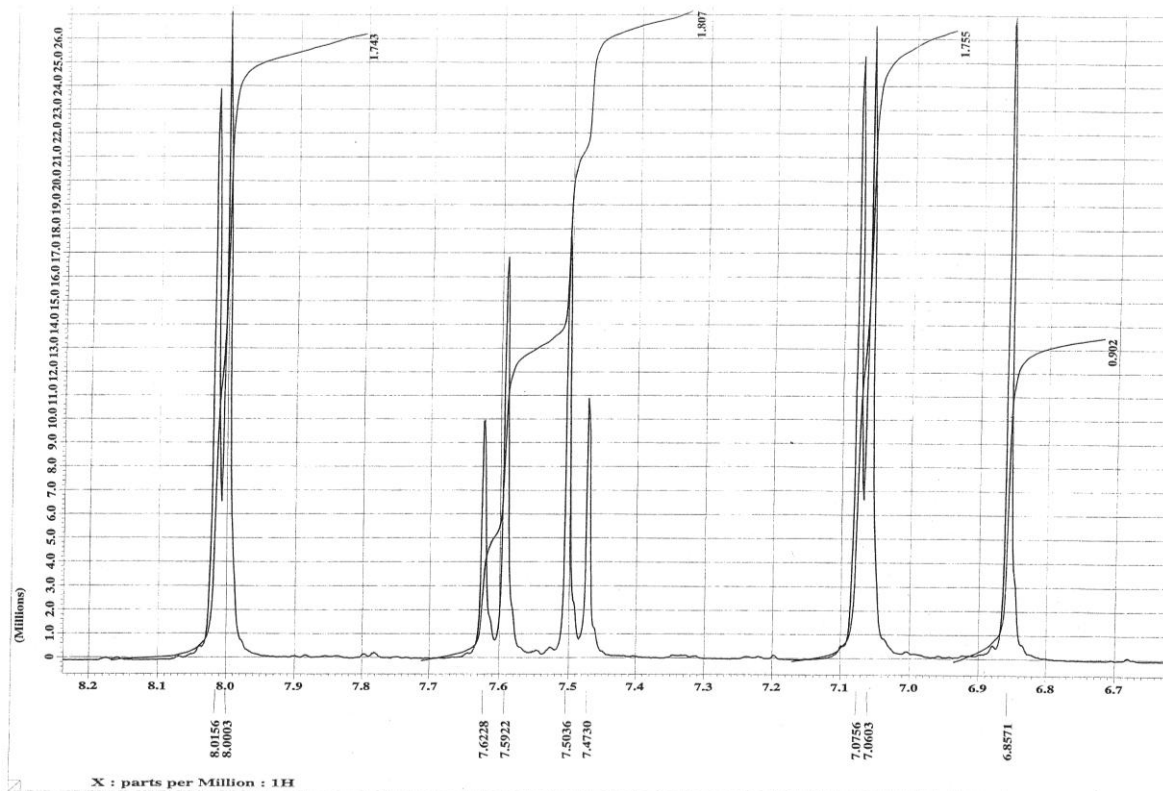

Figure 4. <sup>1</sup>H-NMR of compound 11.

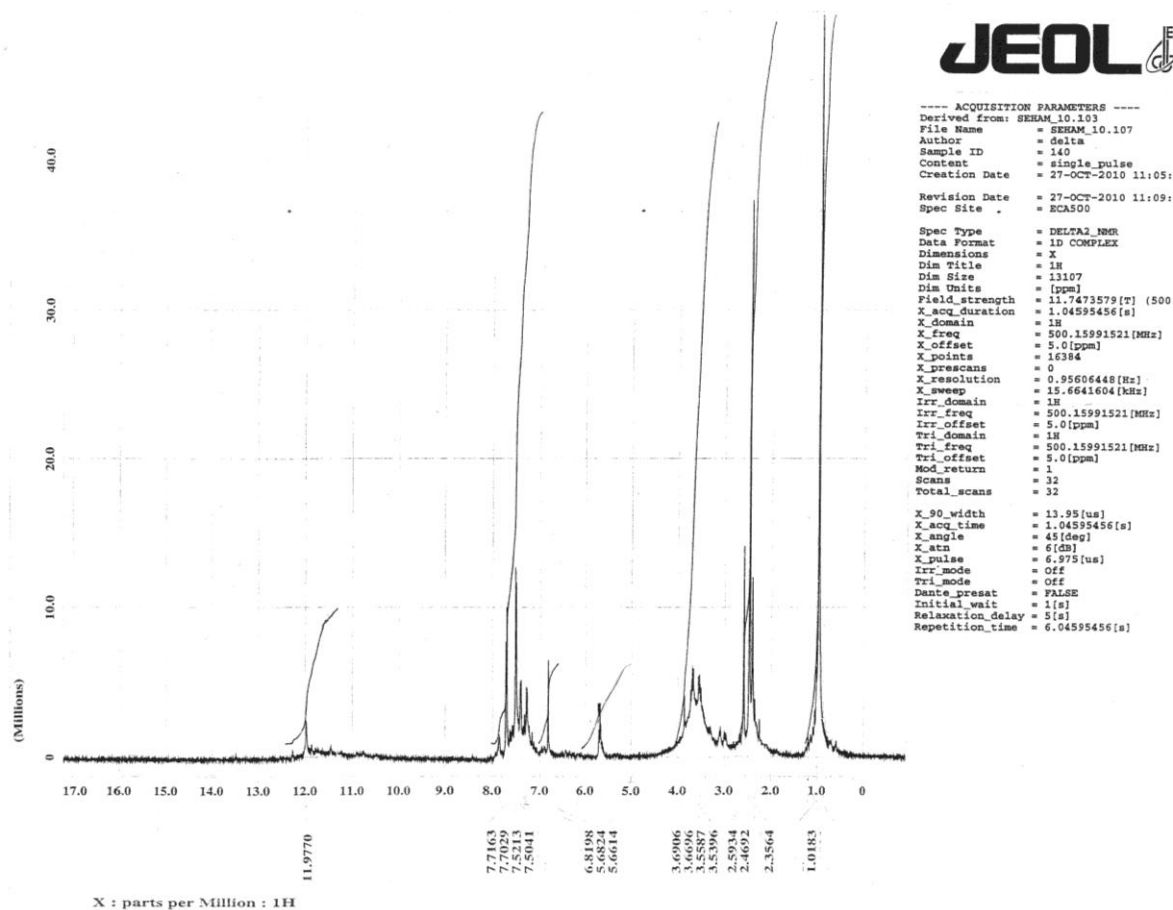

Figure 4. Cont.

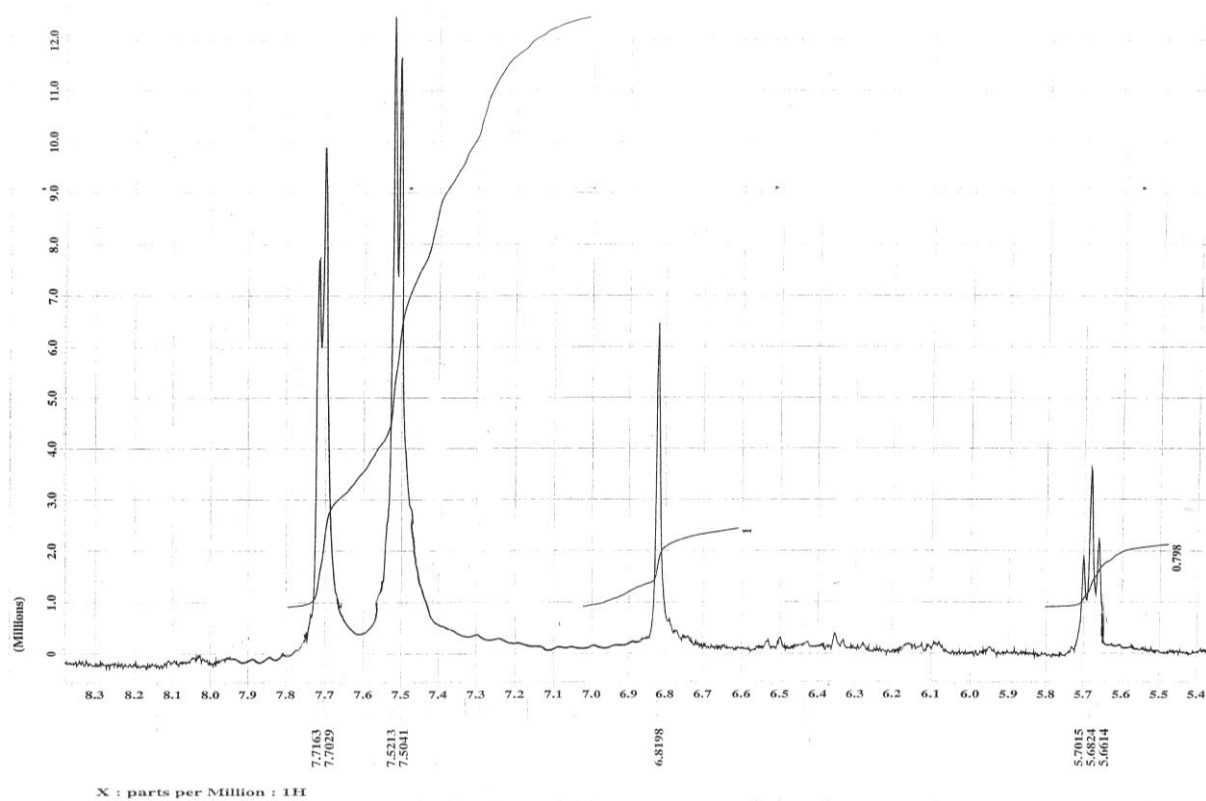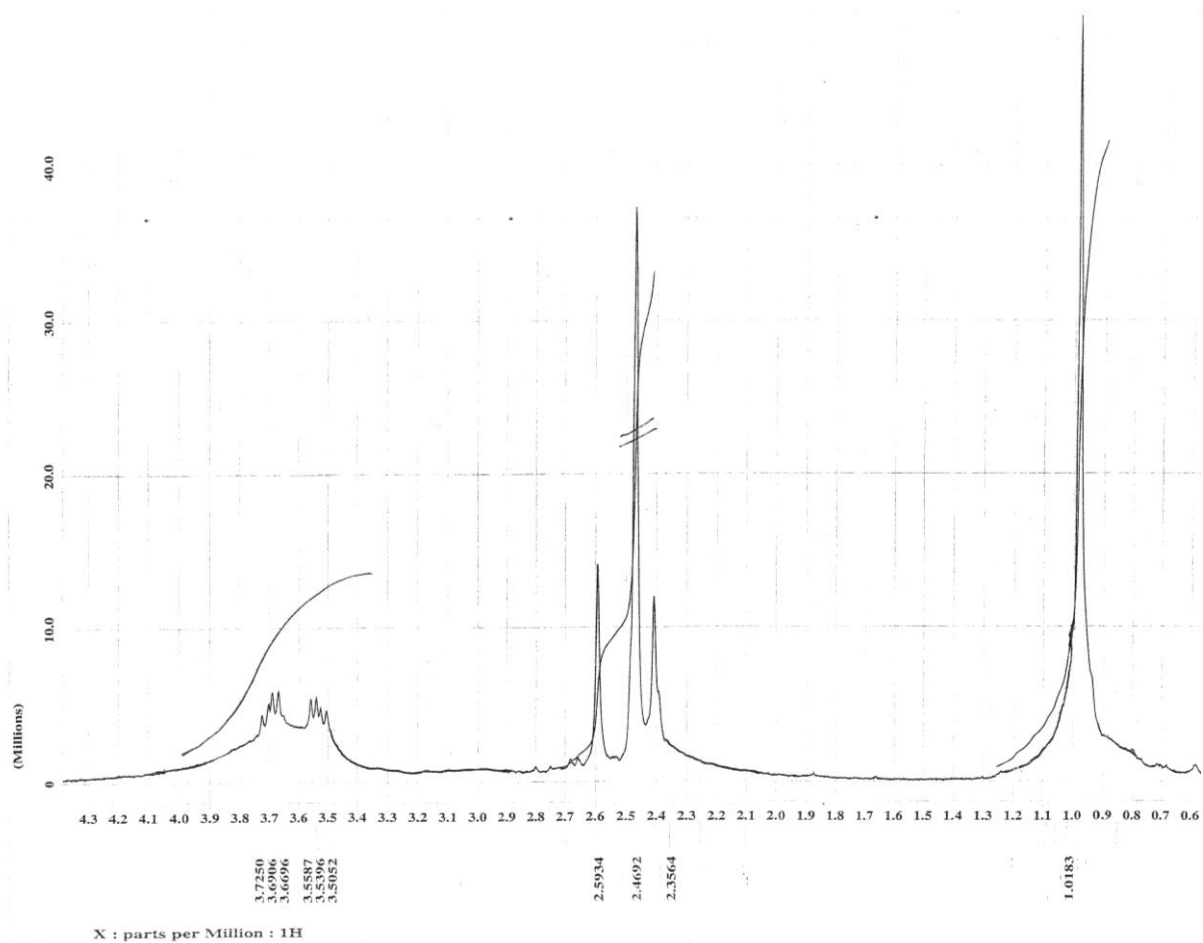

Figure 5. <sup>1</sup>H-NMR of compound 18.

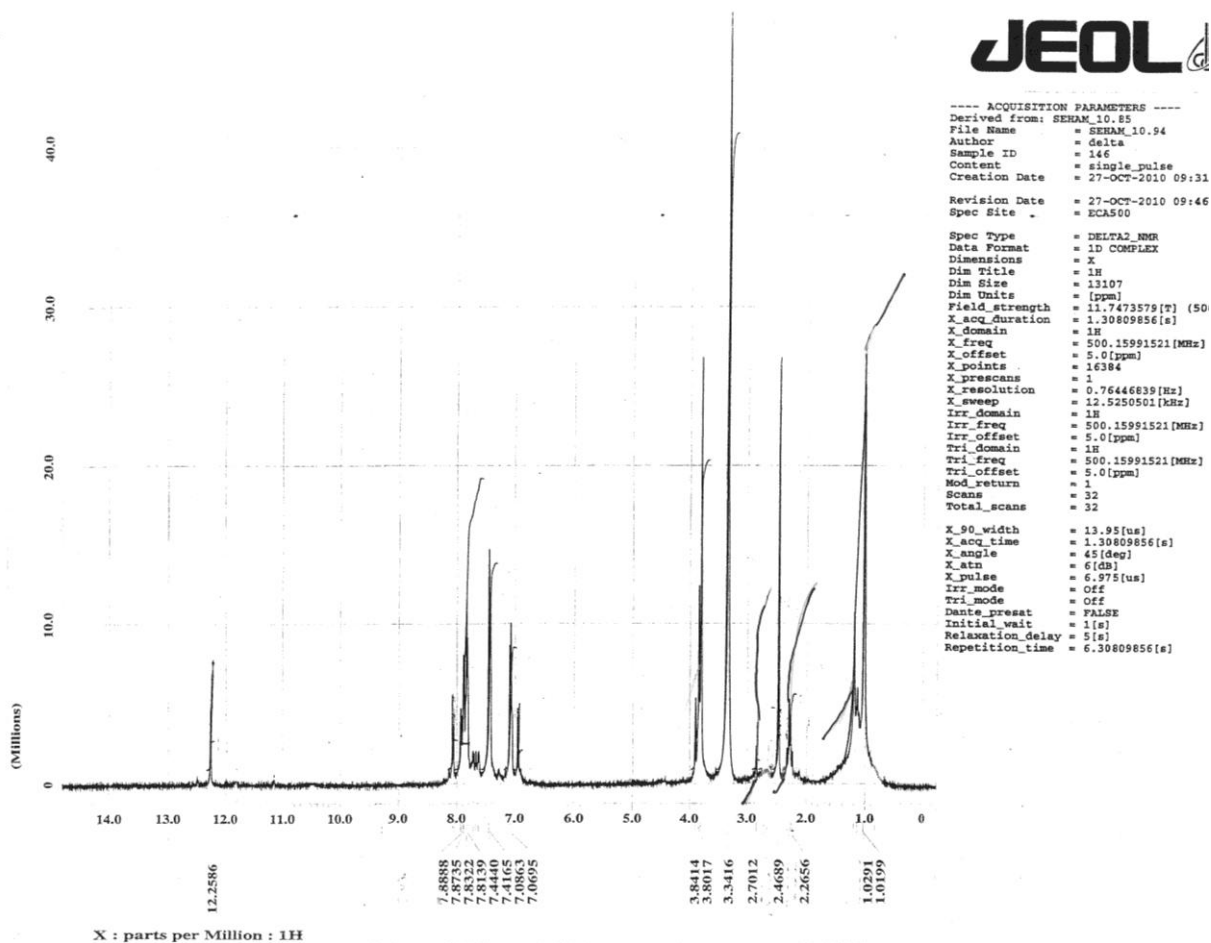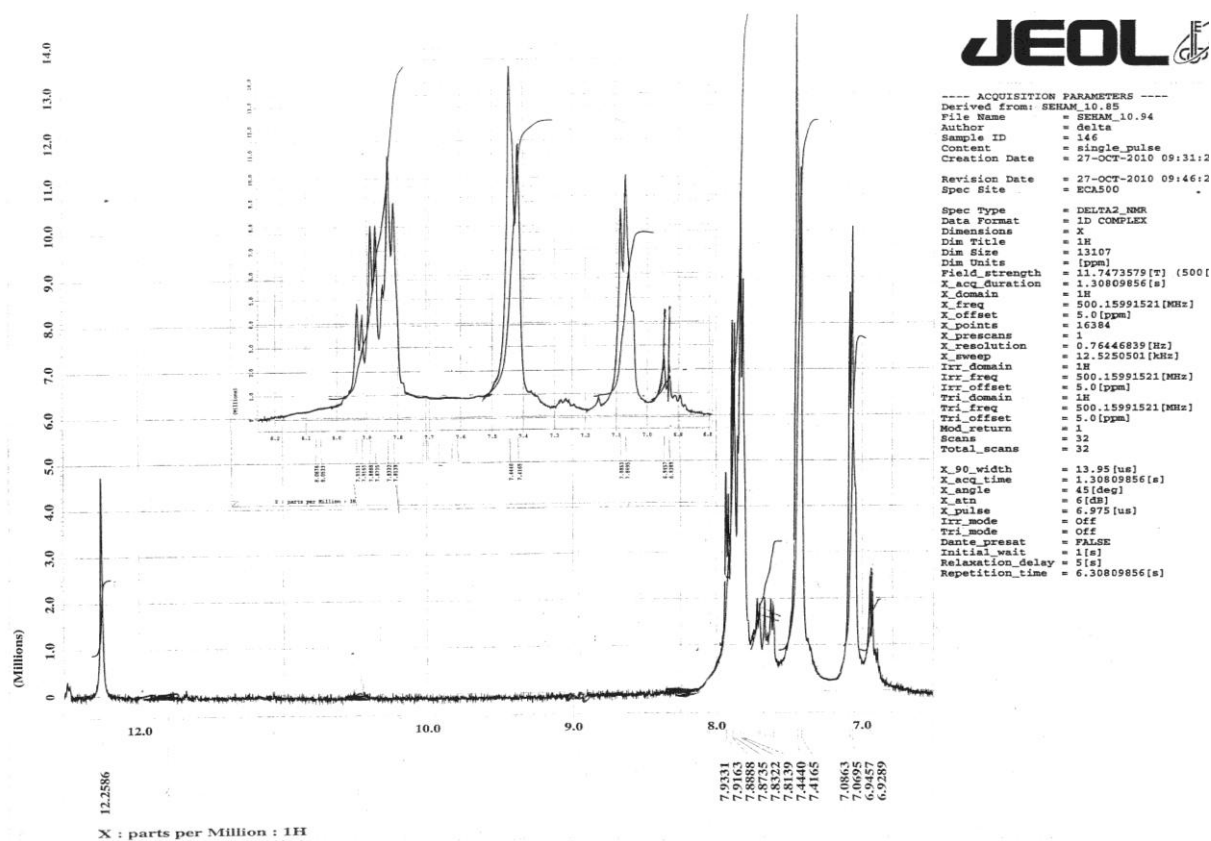

Figure 5. Cont.

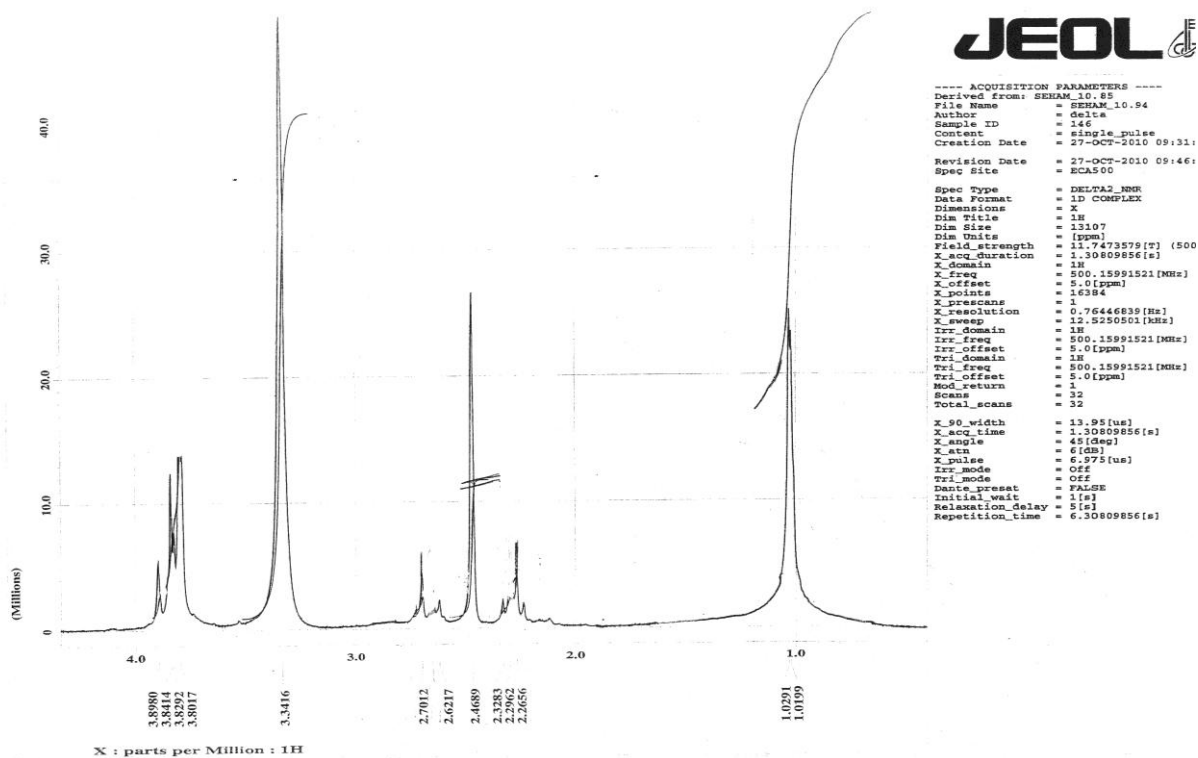Figure 6. <sup>1</sup>H-NMR of compound 22.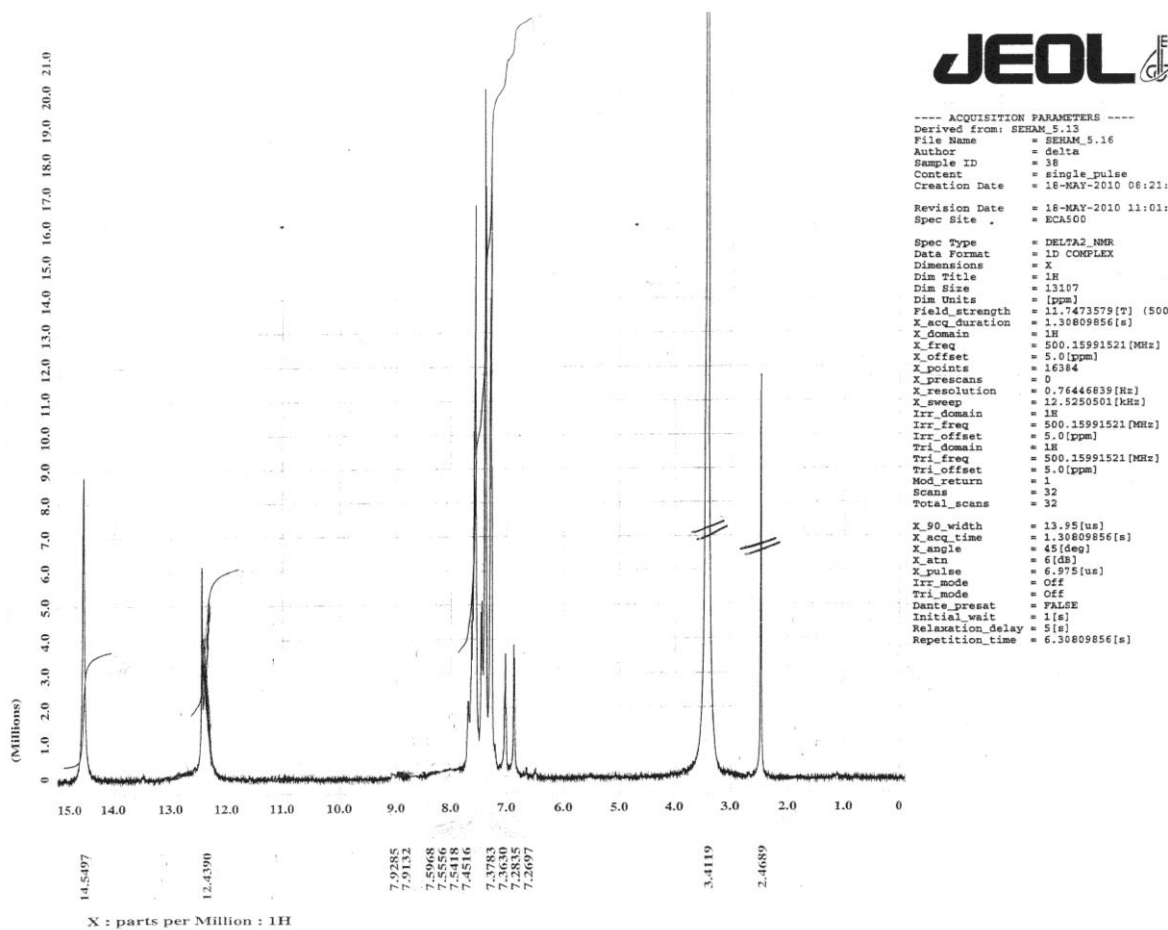

Figure 6. Cont.

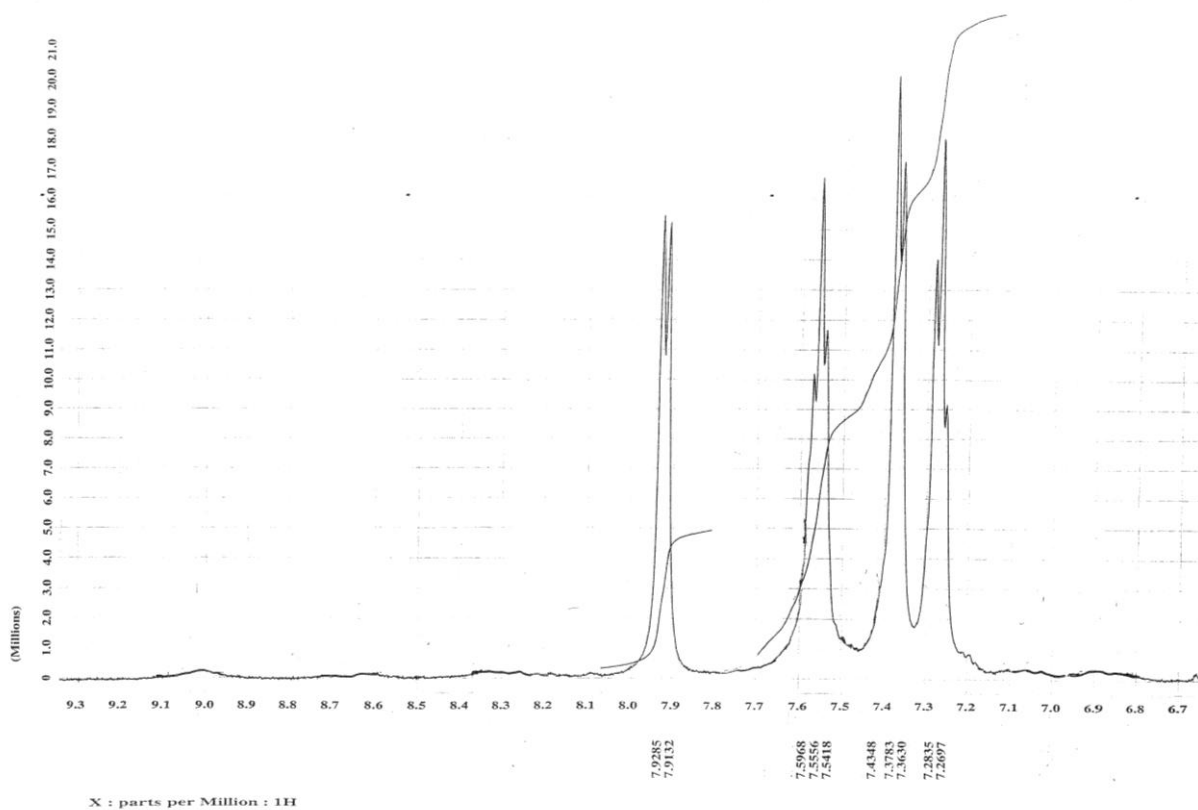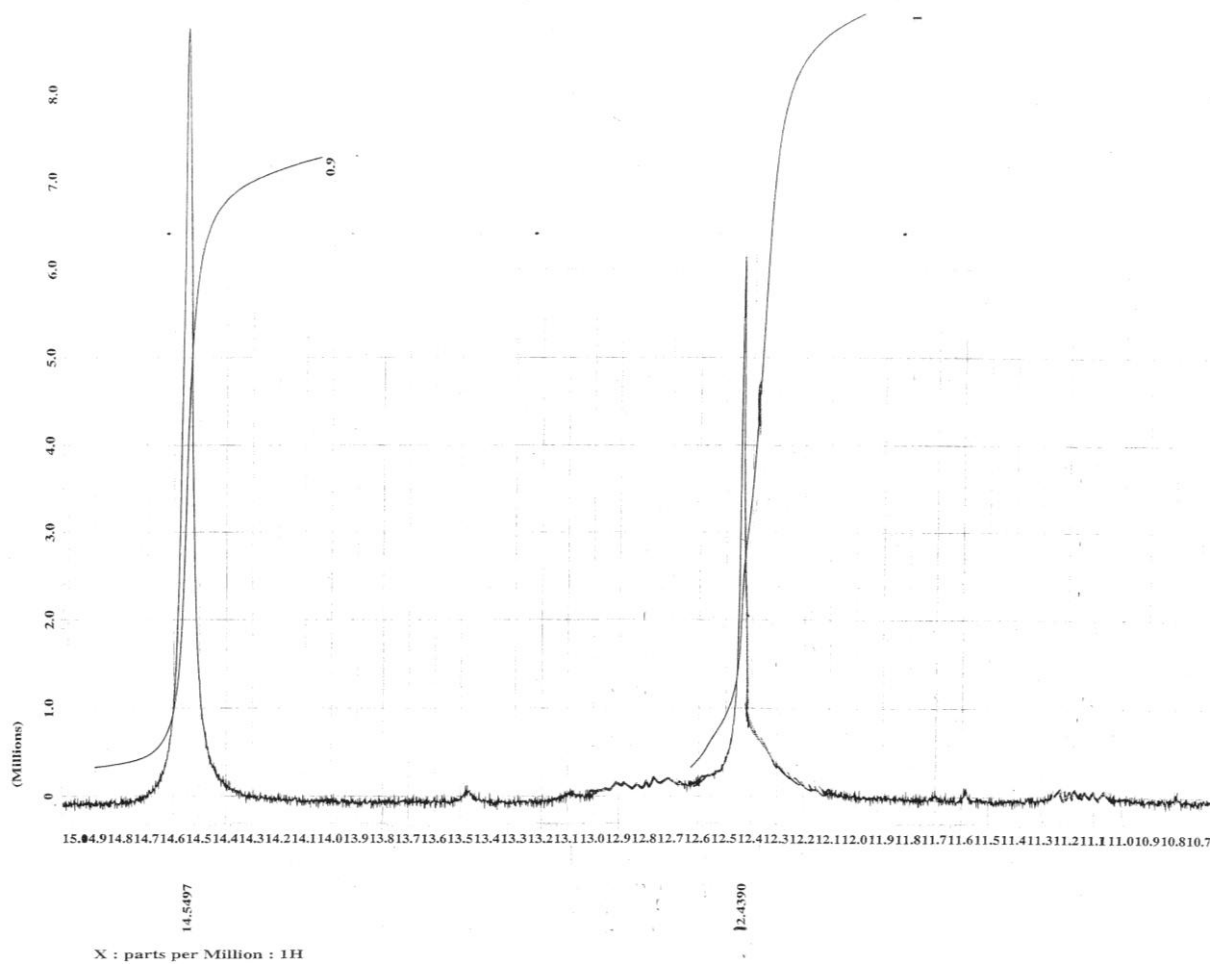



Figure 7. <sup>1</sup>H-NMR of compound 24.

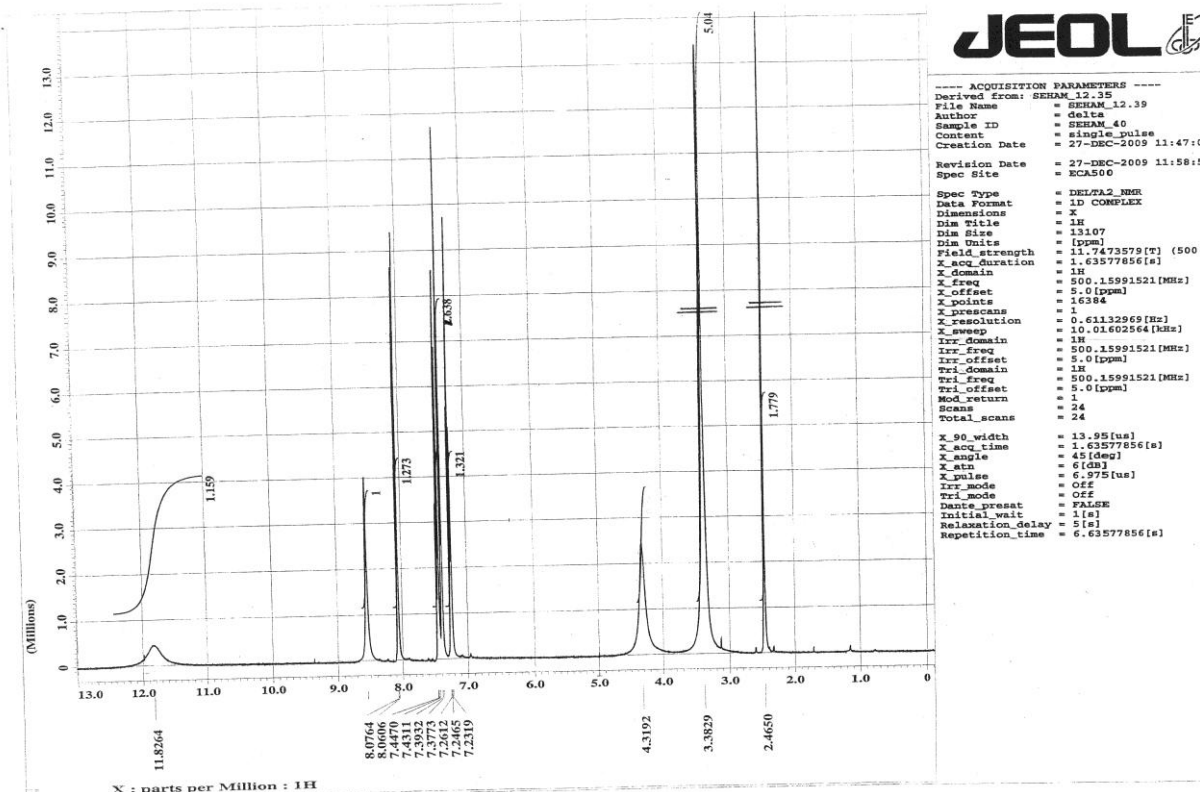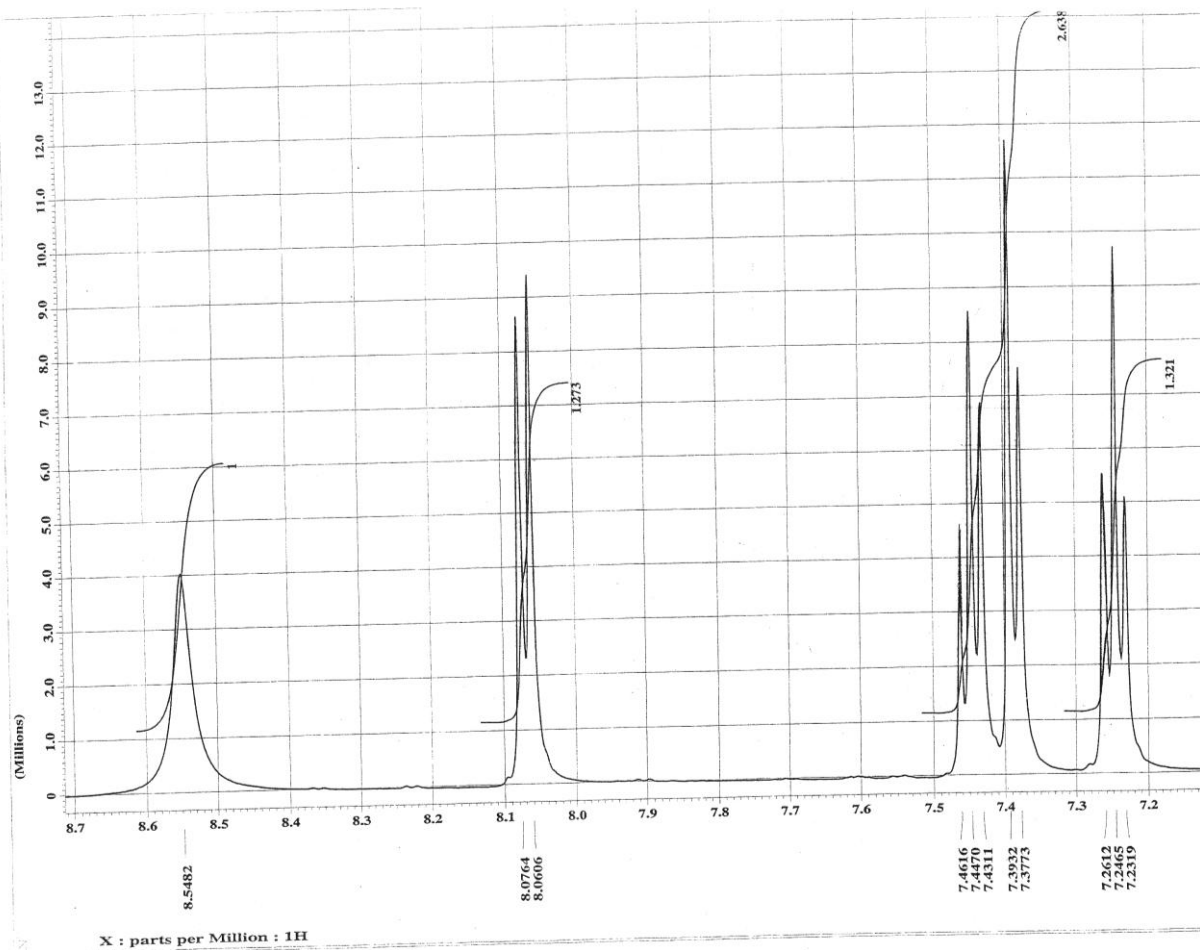

Figure 8. <sup>1</sup>H-NMR of compound 27.

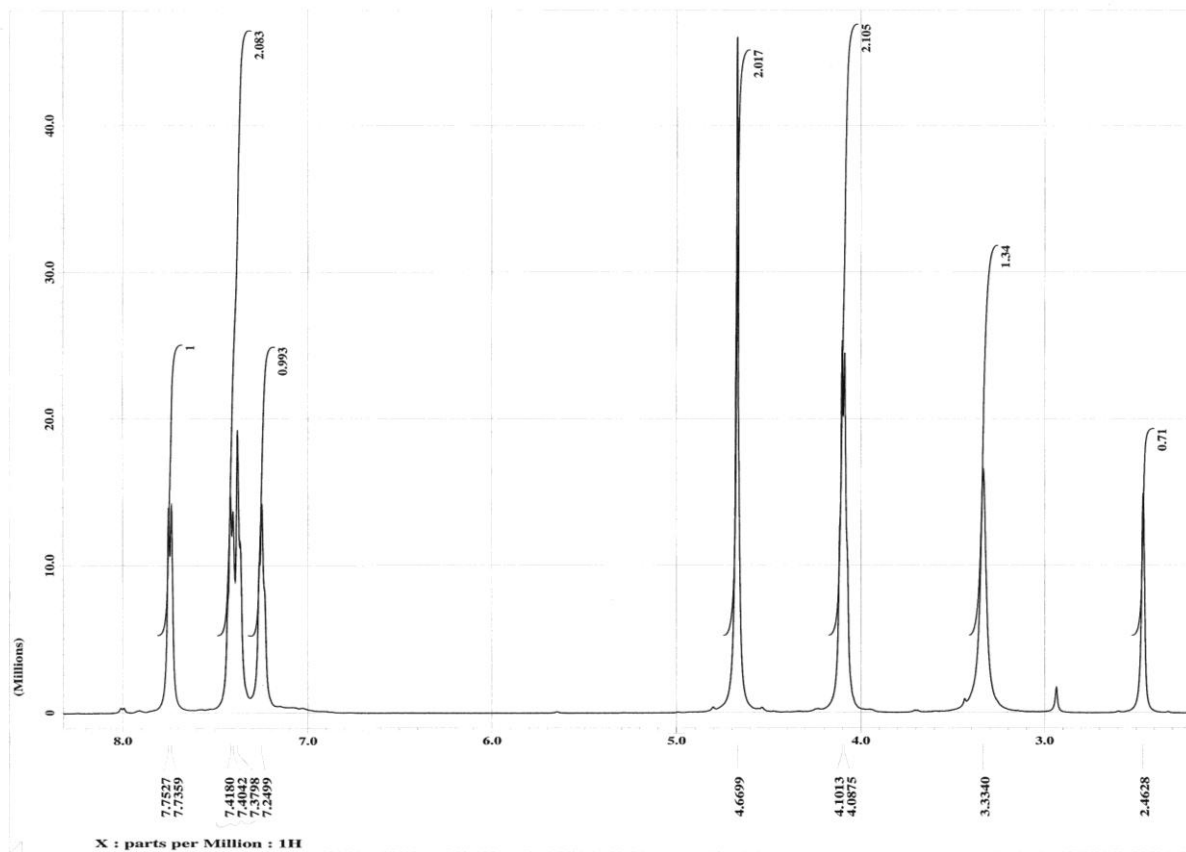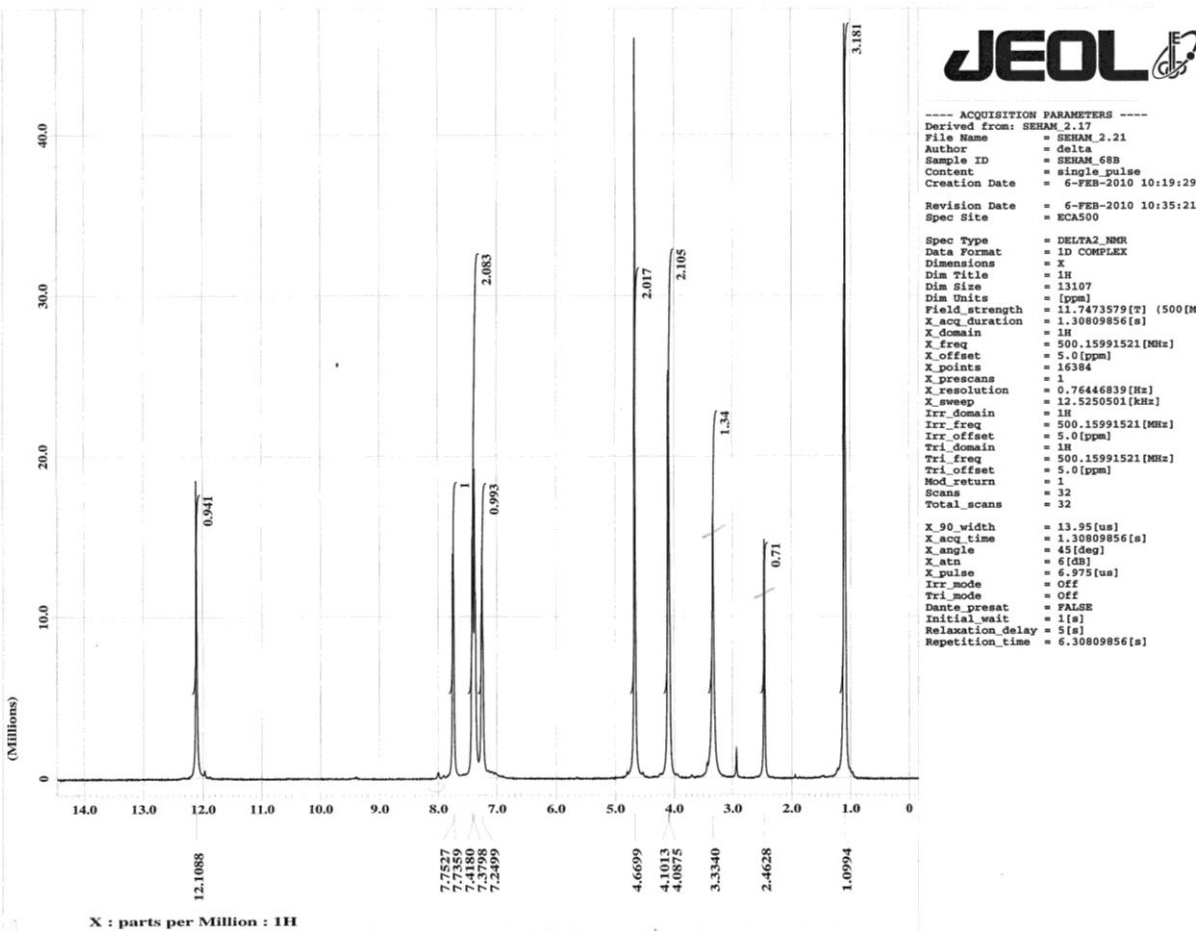

Figure 9.  $^1\text{H-NMR}$  of compound 33.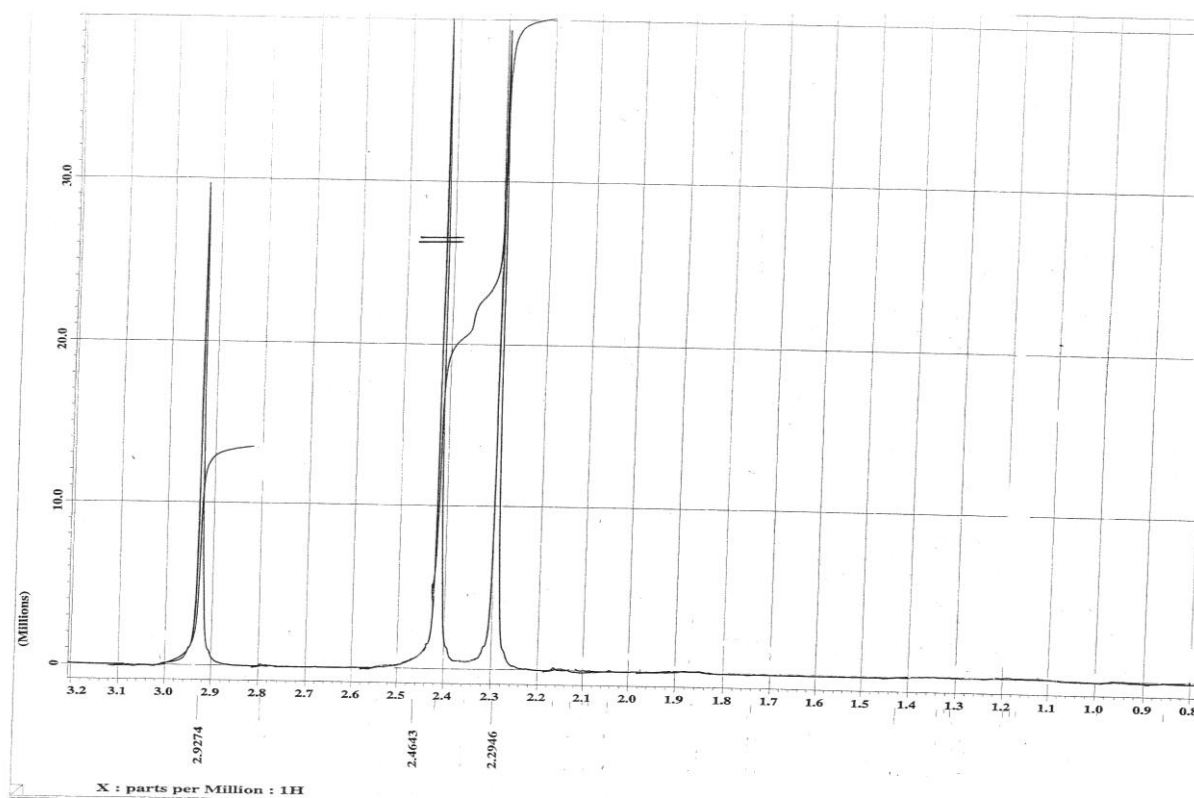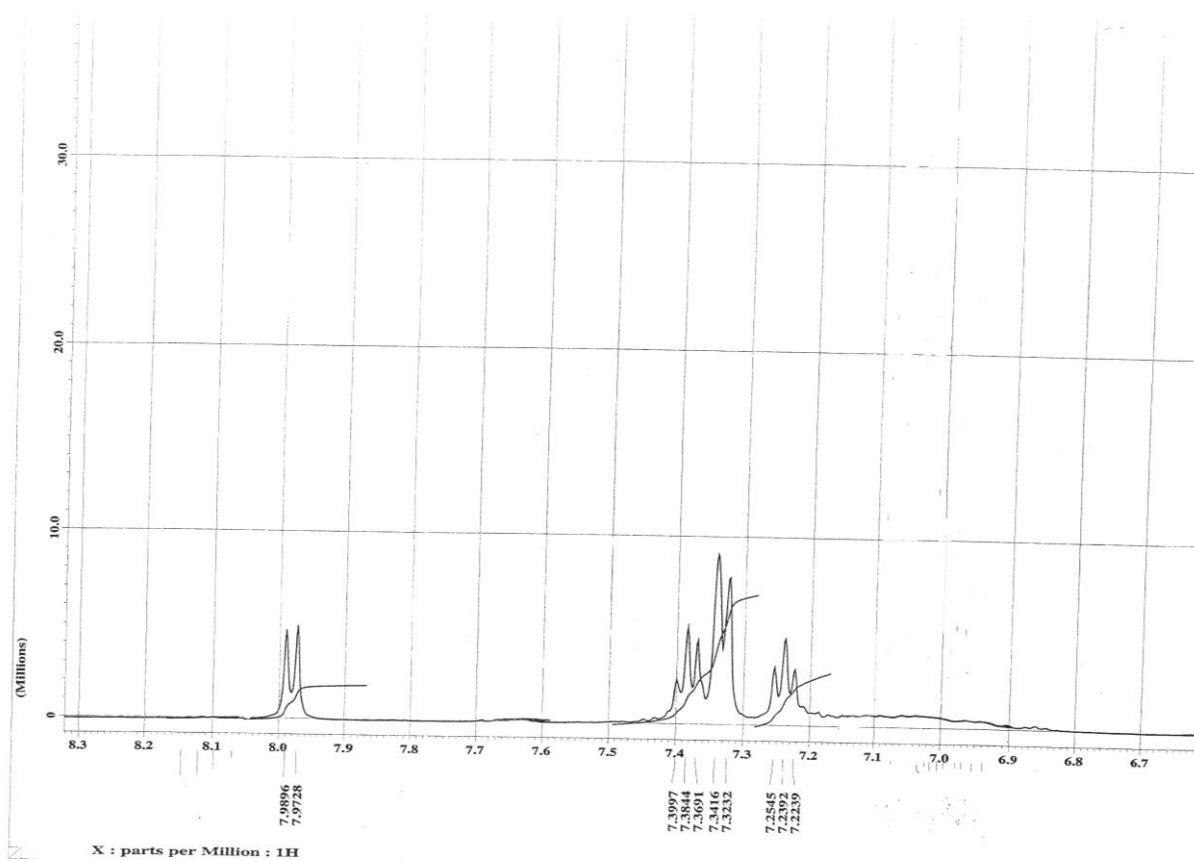

Figure 9. Cont.

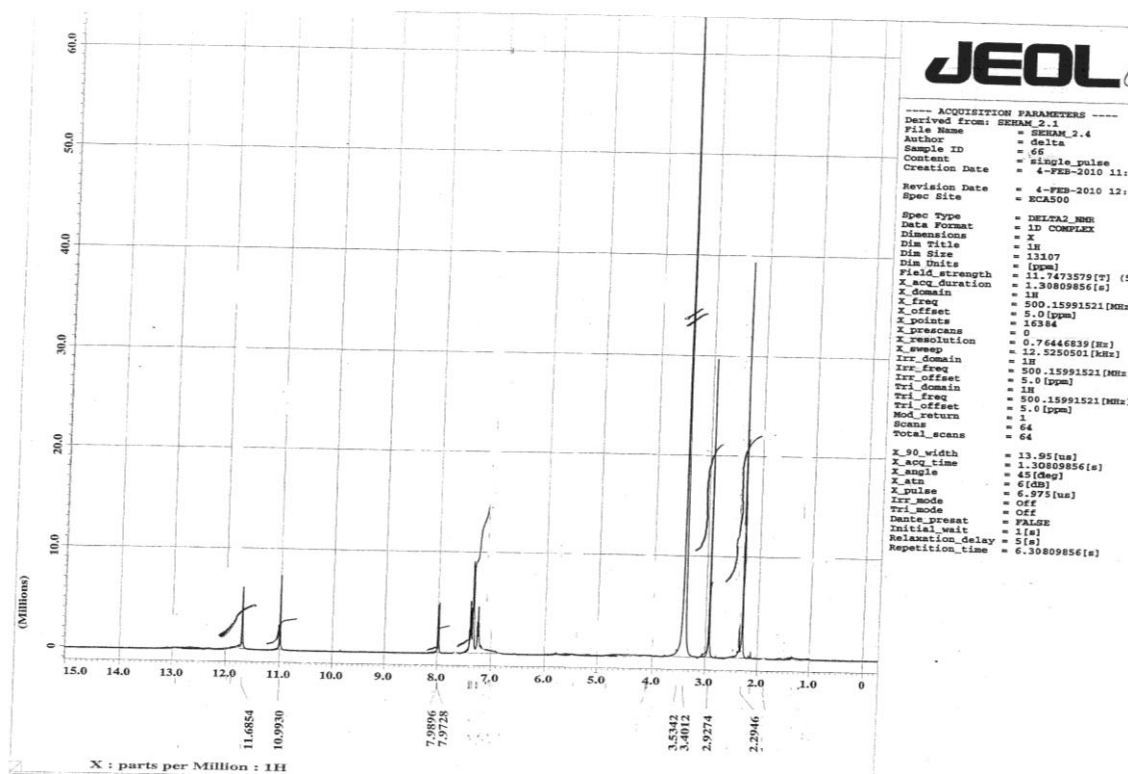

Figure 10. <sup>1</sup>H-NMR of compound 34.

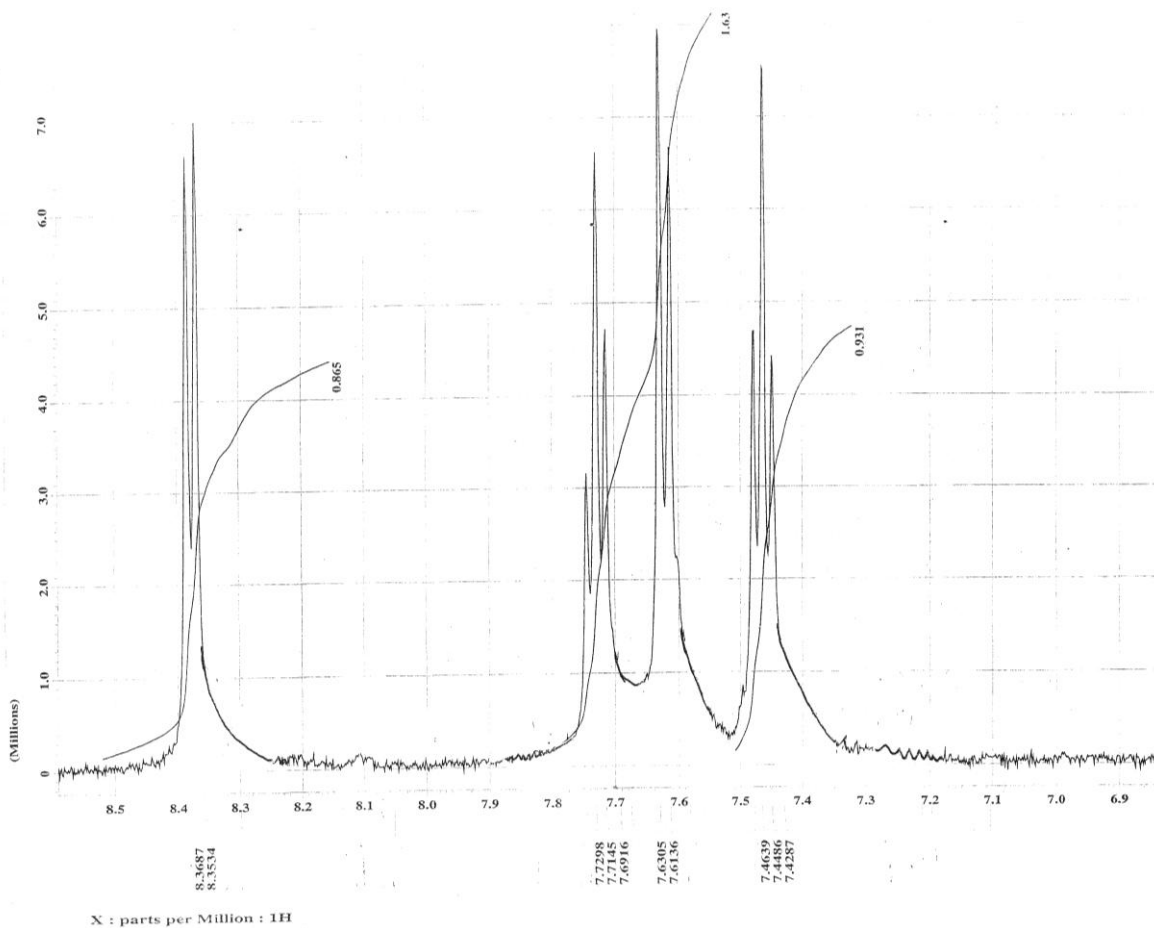

Figure 10. Cont.

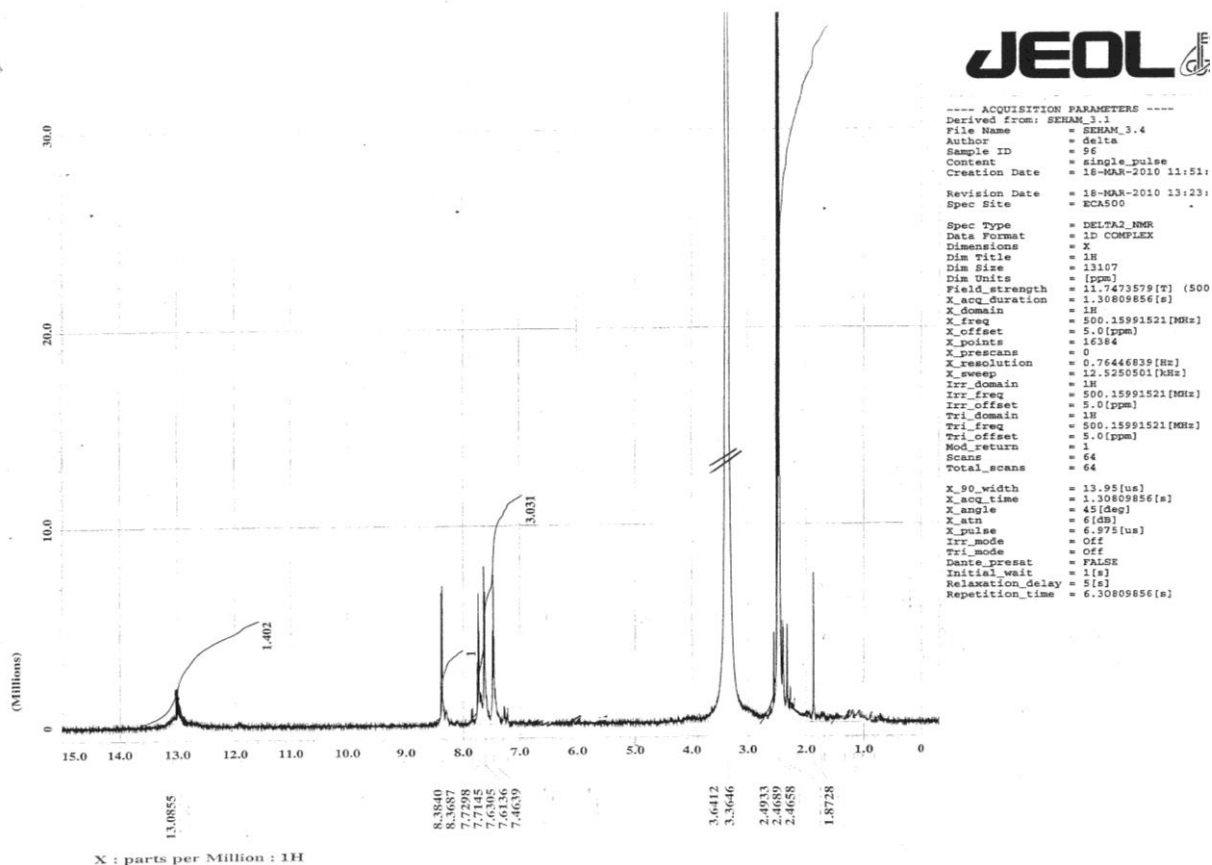

Figure 11. <sup>1</sup>H-NMR of compound 36.

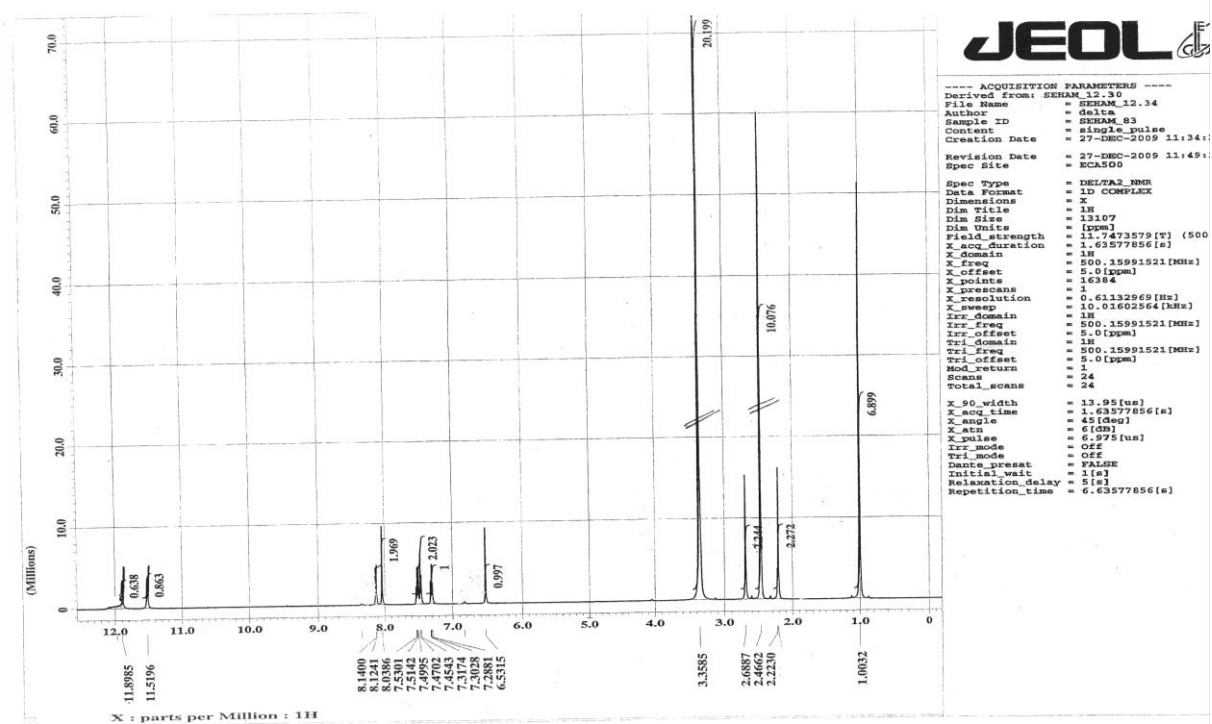

Figure 11. Cont.

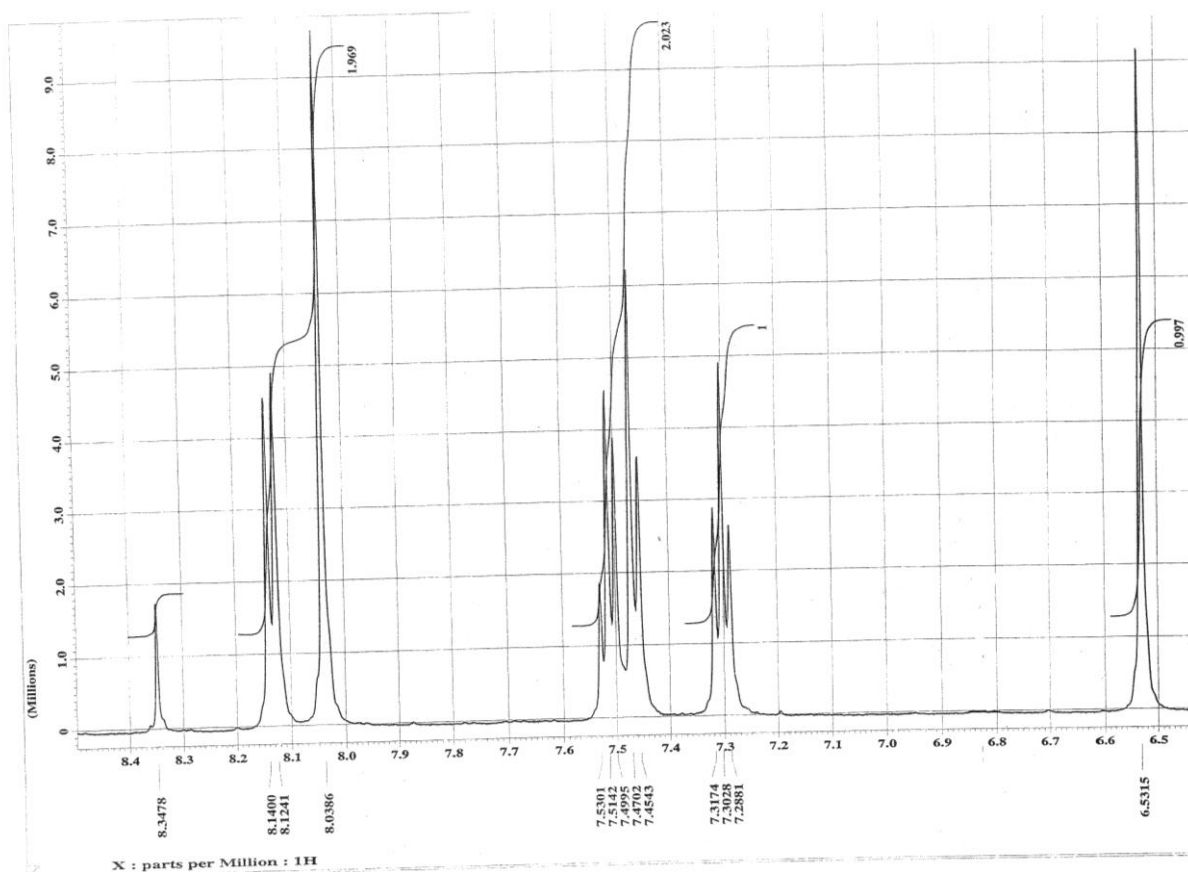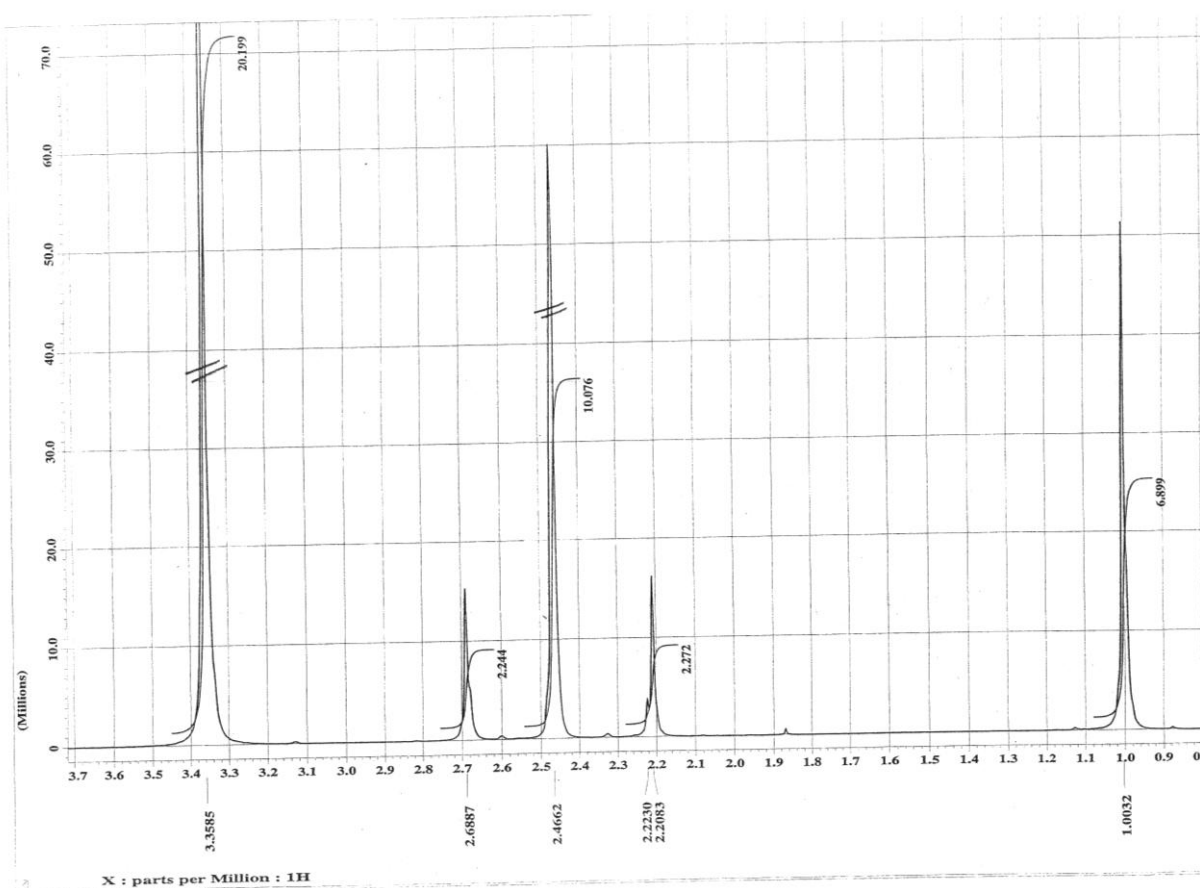

Figure 12.  $^1\text{H-NMR}$  of compound 38.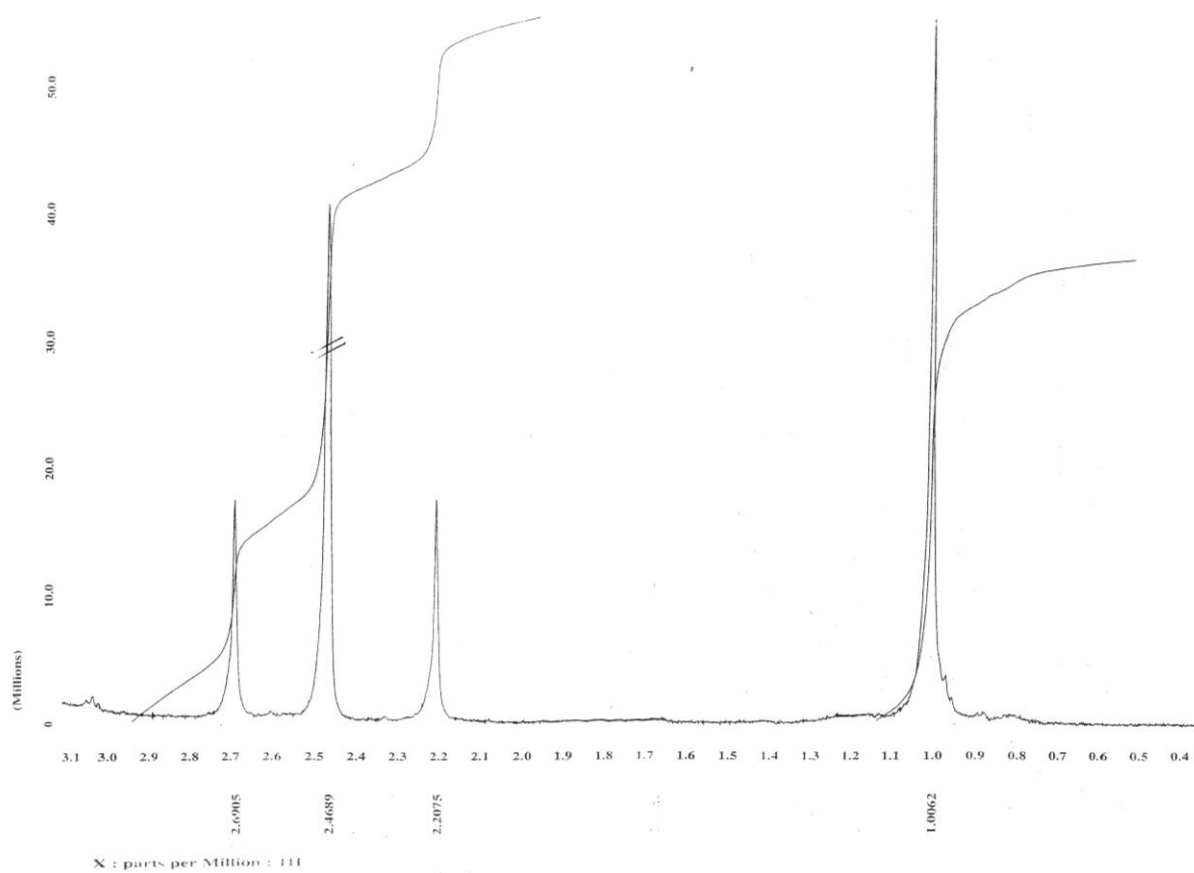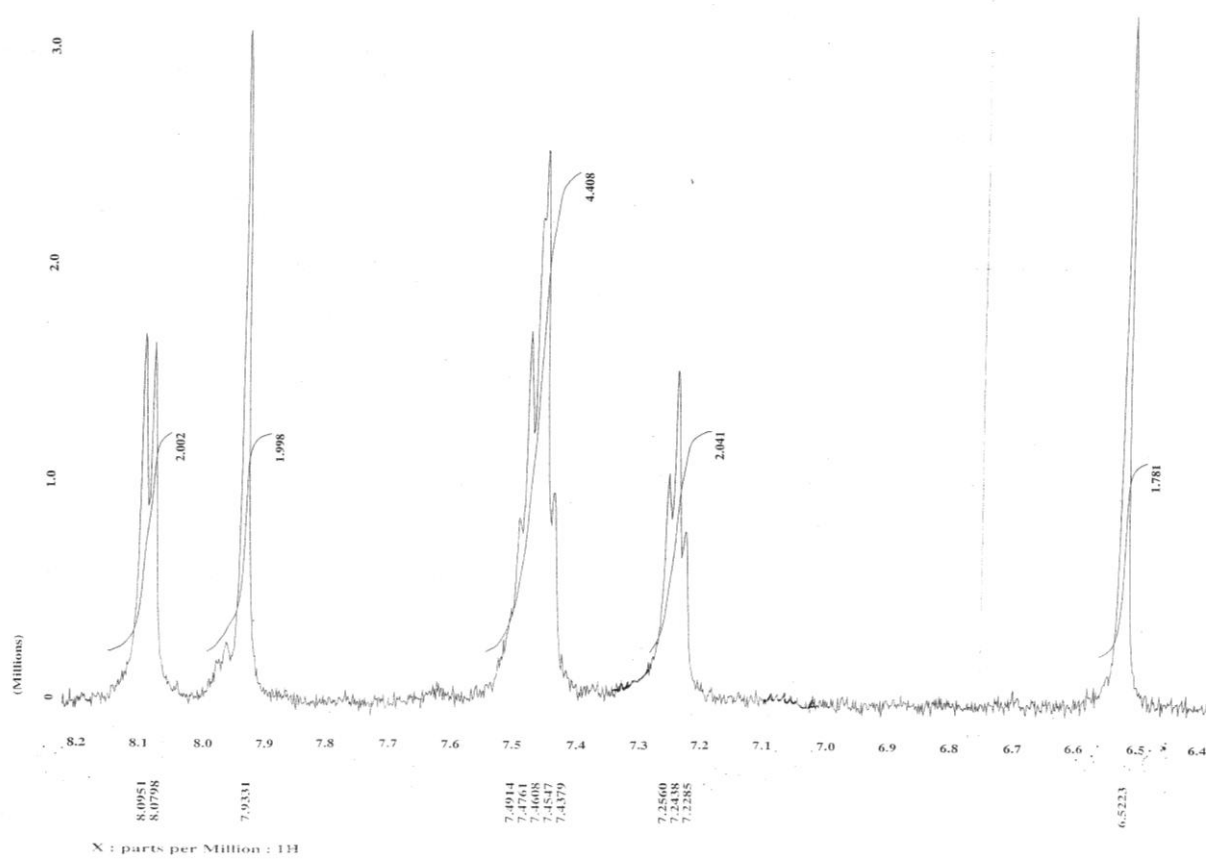

Figure 12. Cont.

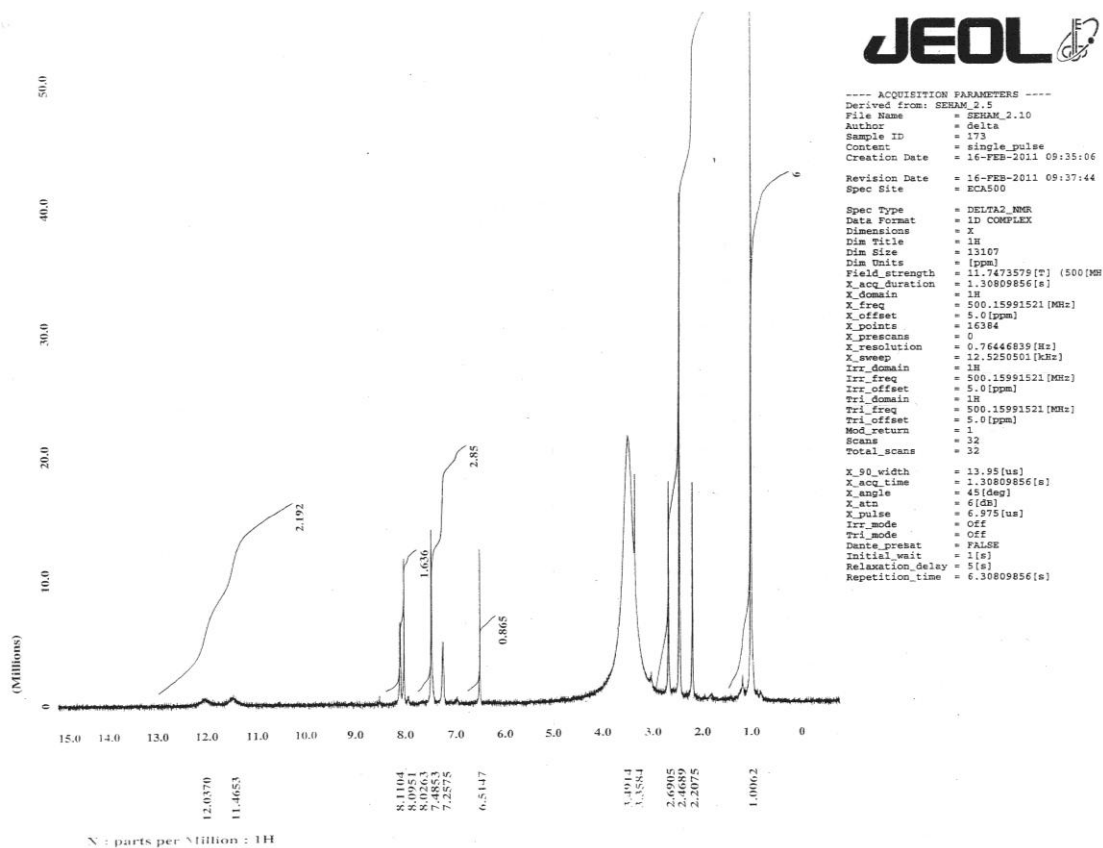

Figure 13. <sup>1</sup>H-NMR of compound 40.

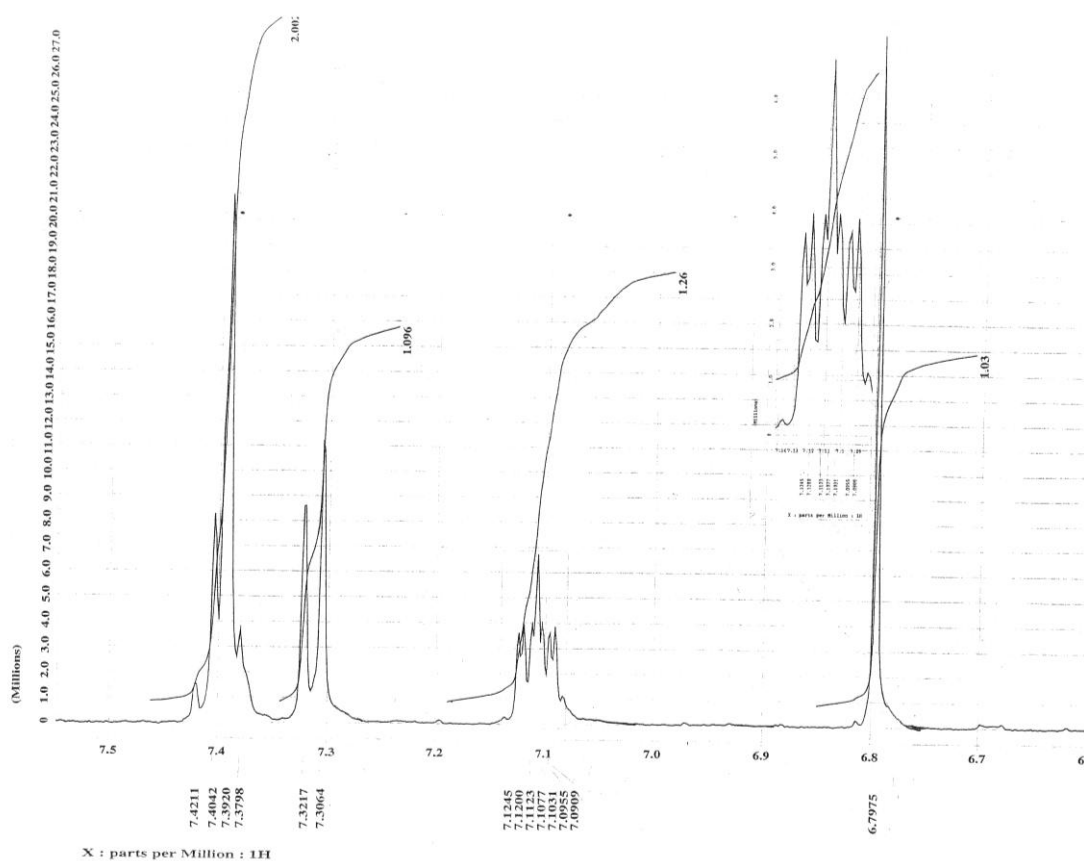



Figure 13. Cont.

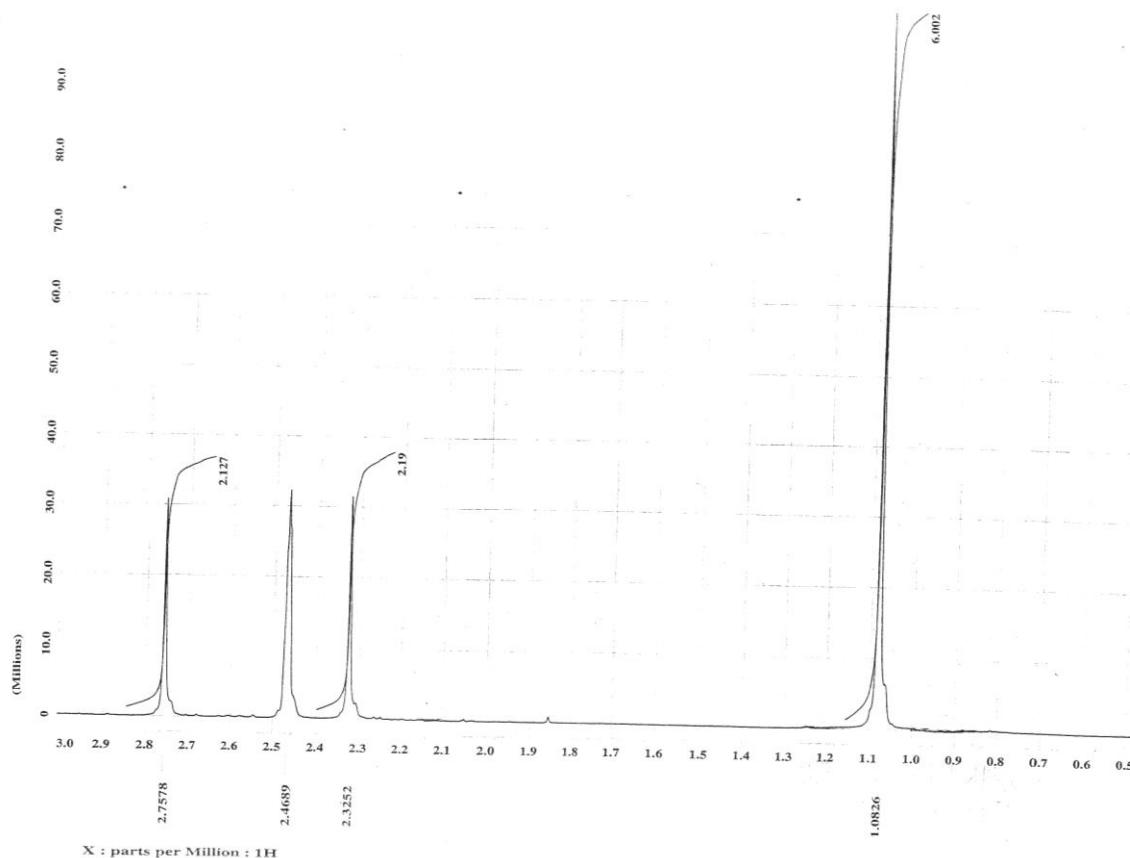

X : parts per Million : 1H

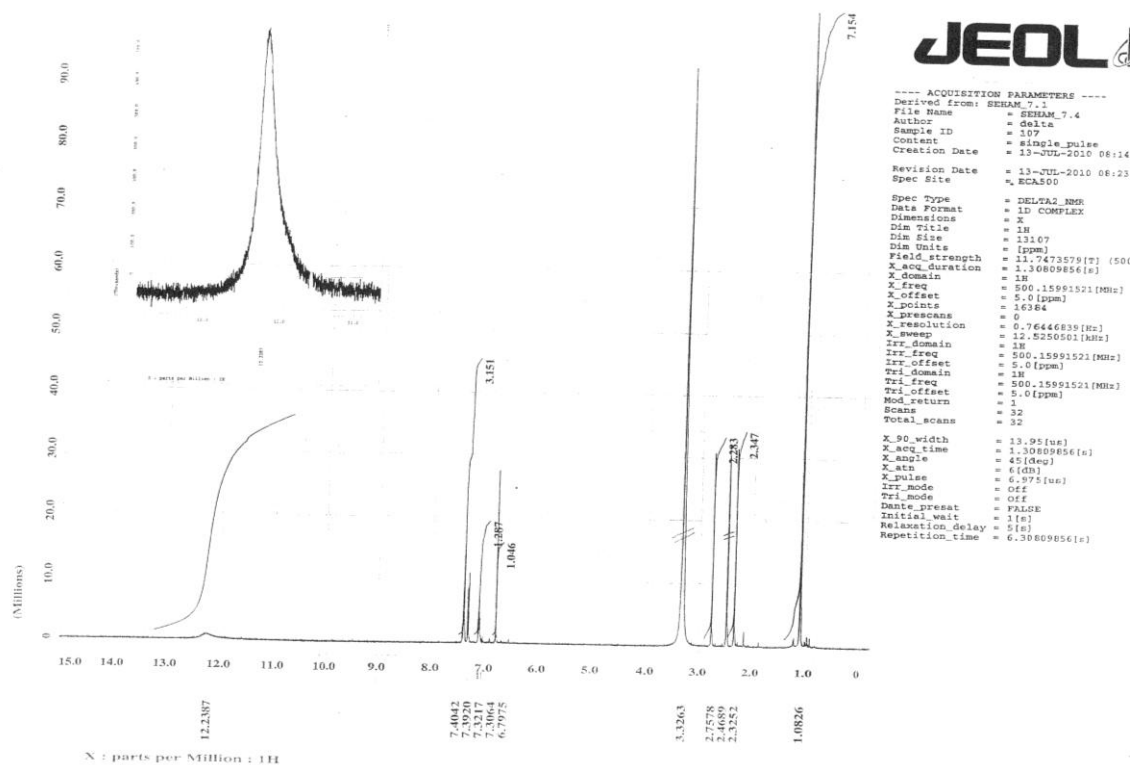

X : parts per Million : 1H

Figure 14.  $^{13}\text{C}$ -NMR of compound 2.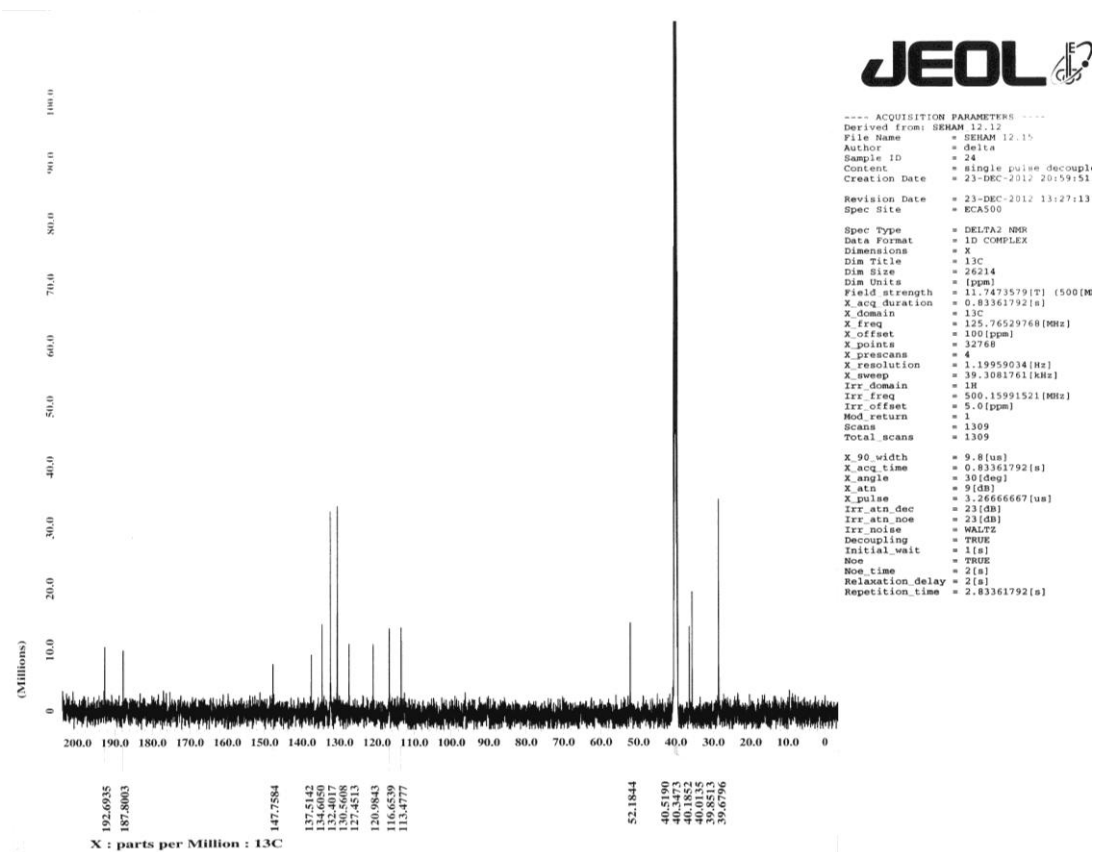Figure 15.  $^{13}\text{C}$ -NMR of compound 27.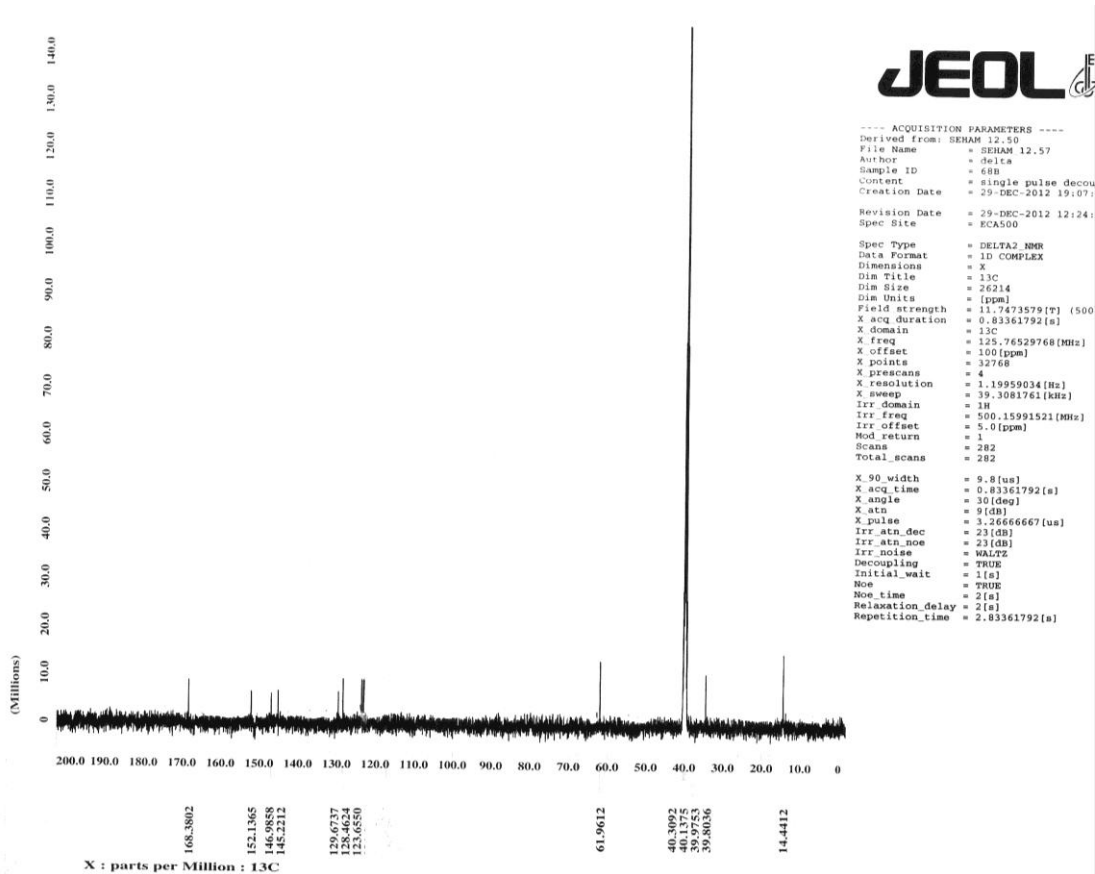

Figure 15. Cont.

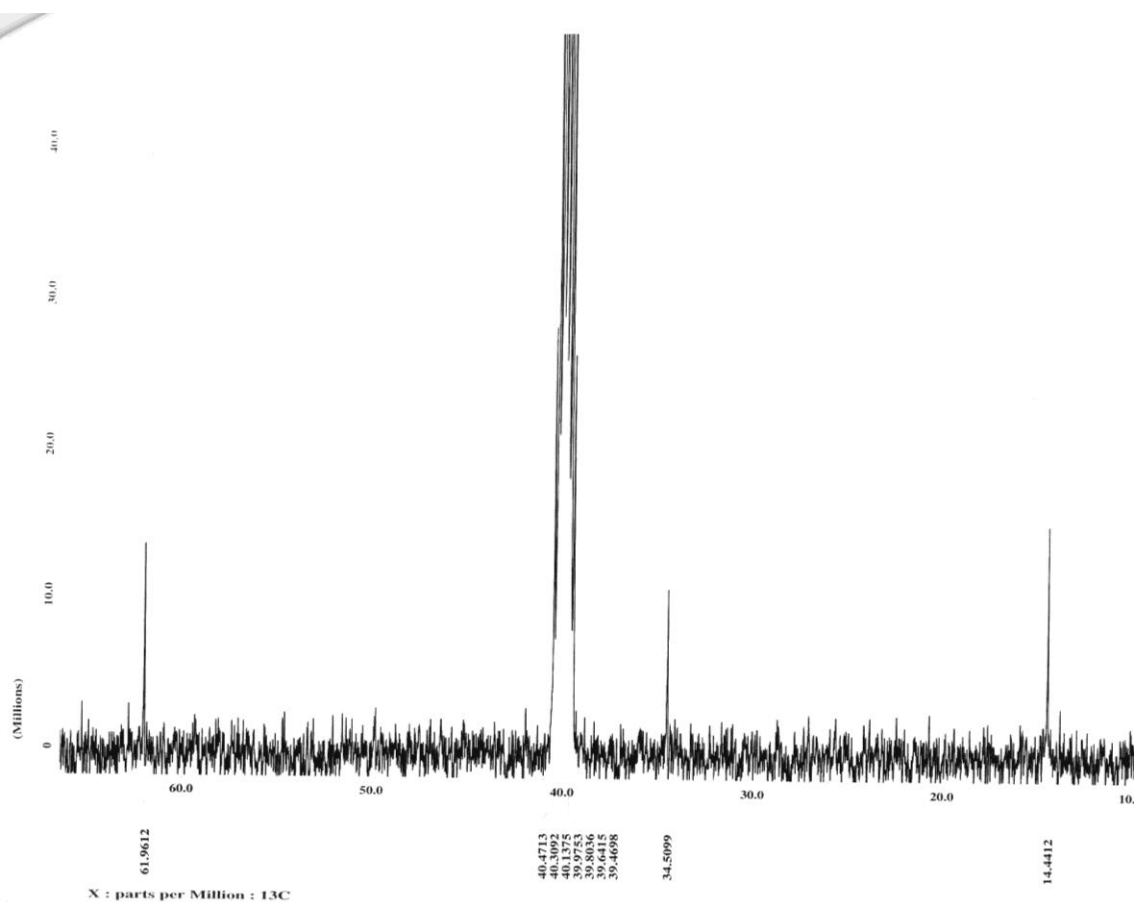Figure 16. <sup>13</sup>C-NMR of compound 35.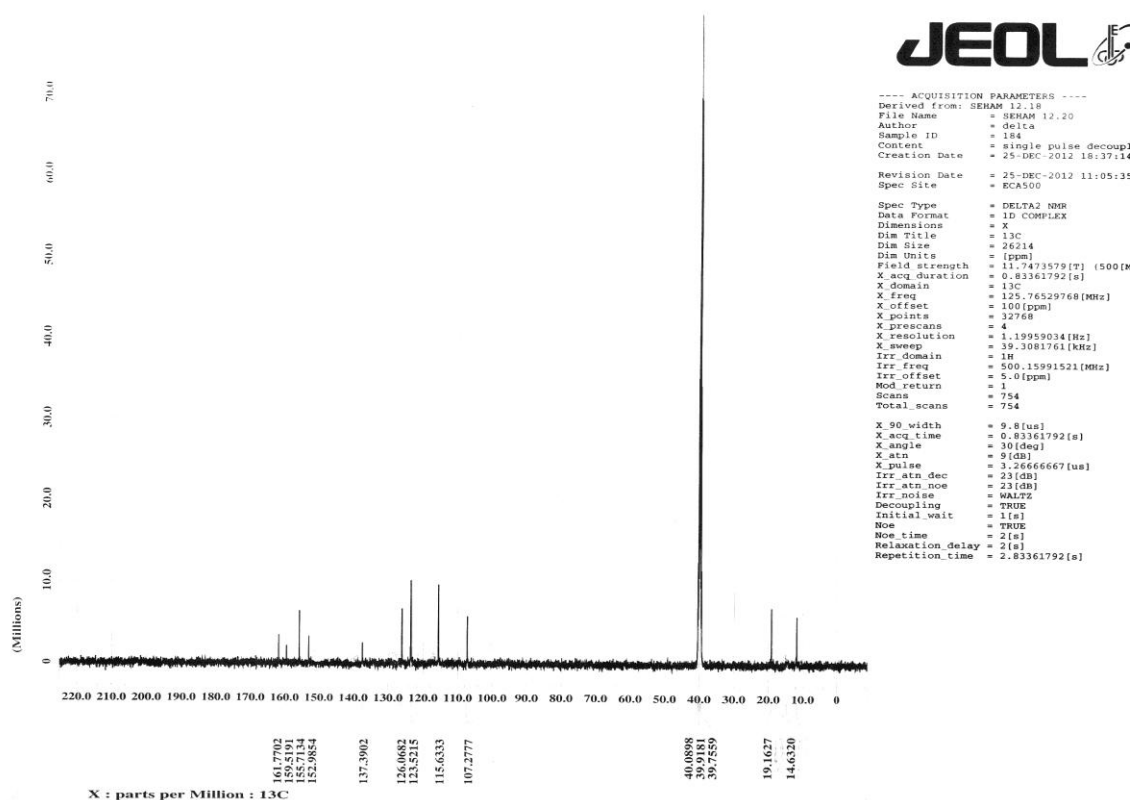

Figure 17. <sup>13</sup>C-NMR of compound 36.

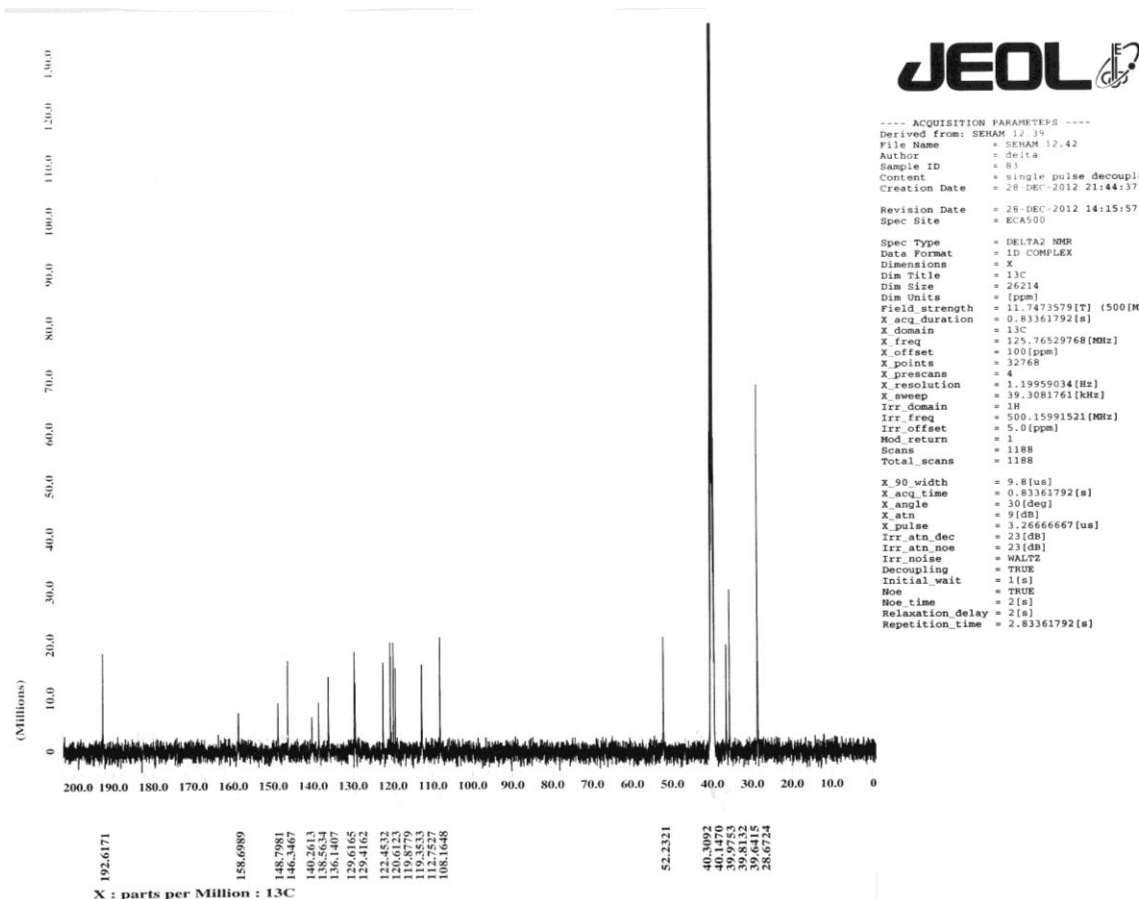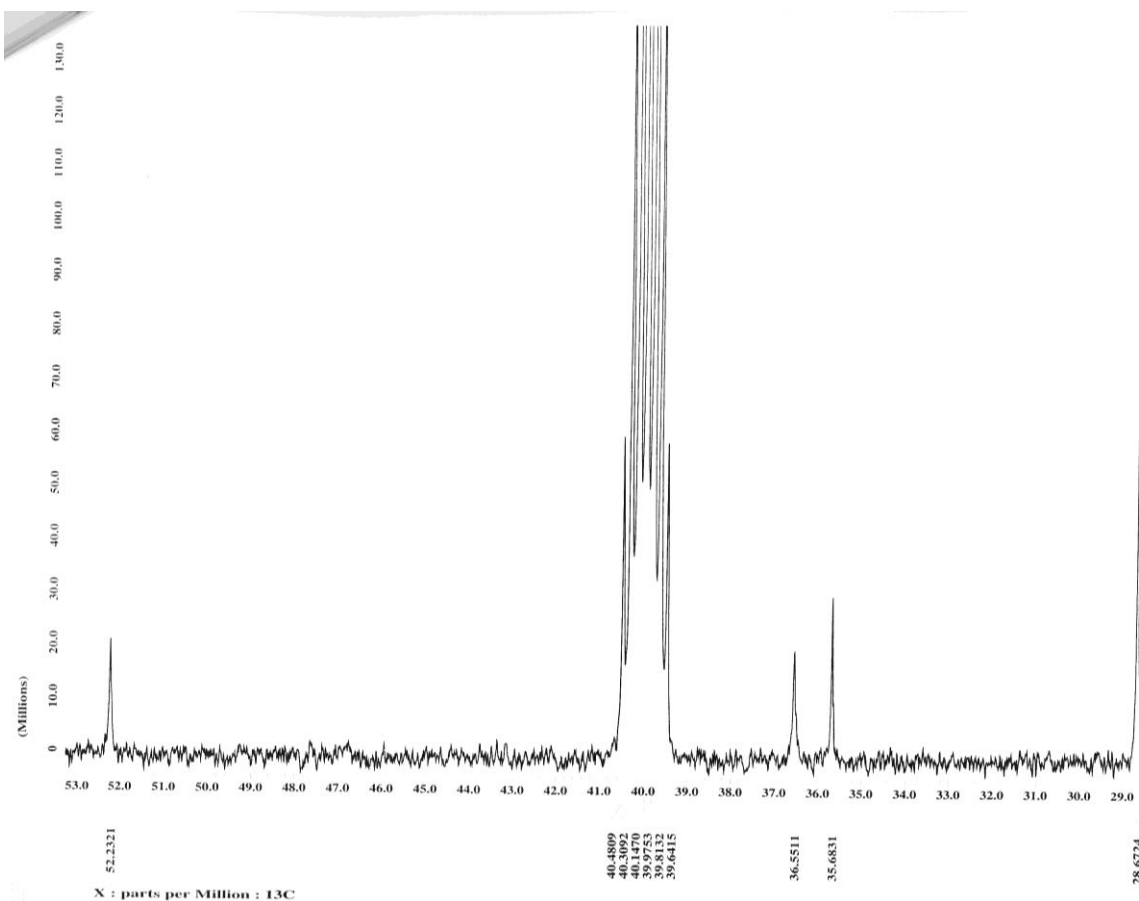

Figure 18. <sup>13</sup>C-NMR of compound 22.

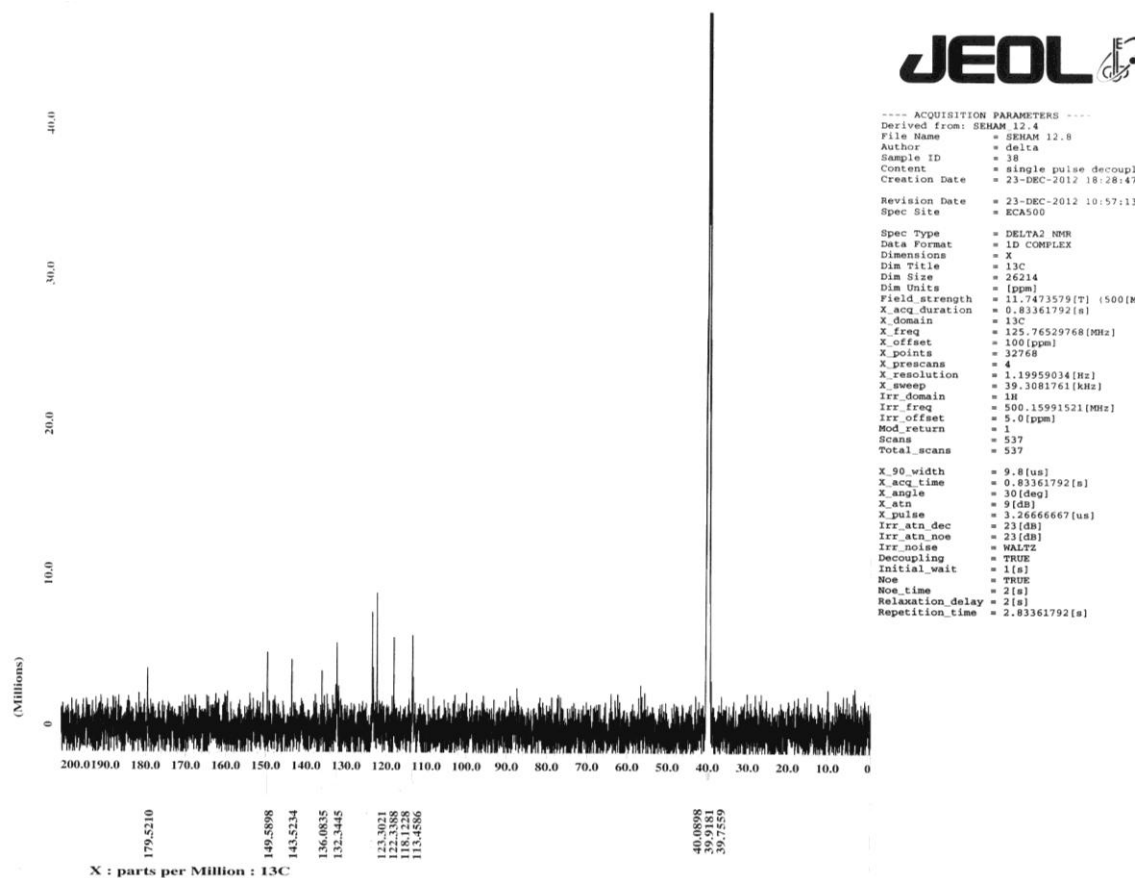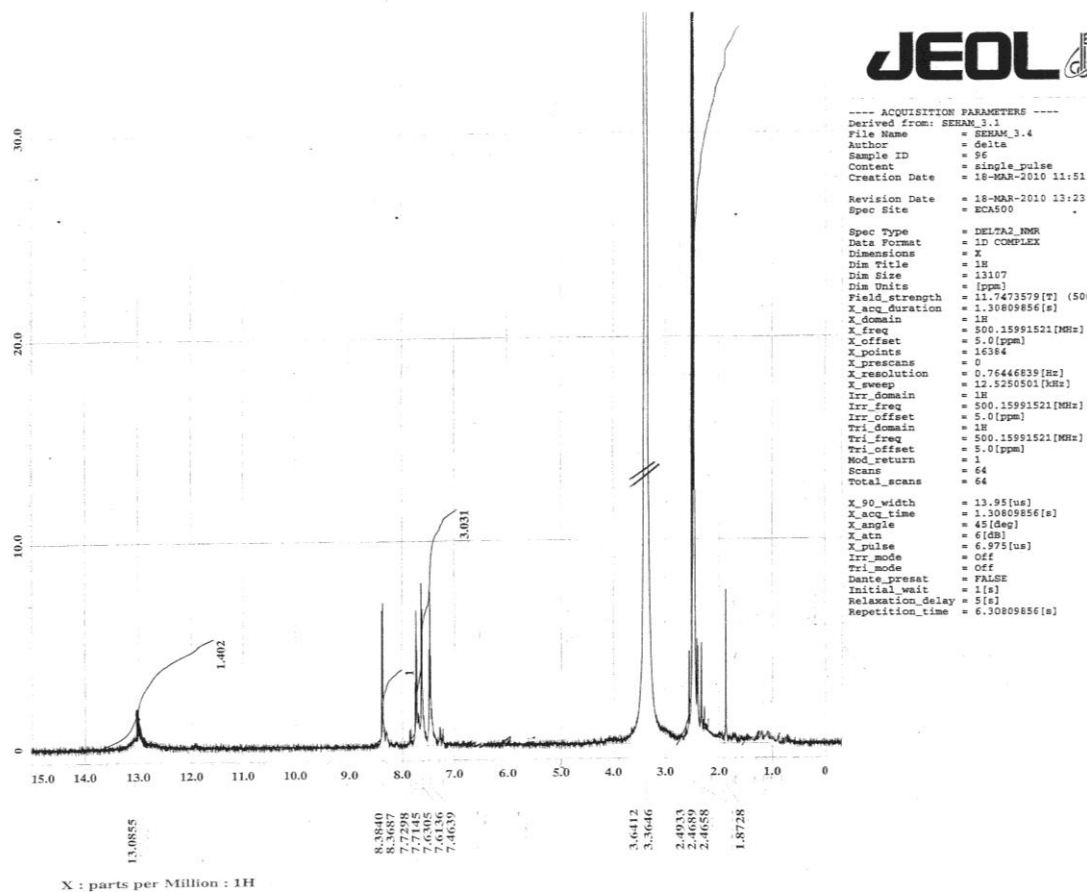

Supplement: molecules-18-02683-s001.pdf [file molecules-18-02683-s001.pdf]
